# Supplementary material for: Phosphido-borane-supported stannates
Source: Royal Society of Chemistry journal article supplement (doi:10.1039/d2dt03587a), 2022-12-24
Supplement: d2dt03587a1.pdf [file d2dt03587a1.pdf]

## Phosphido-Borane-Supported Stannates

Keith Izod,\* Atheer M. Madlool, Alex Craig, Paul G. Waddell

*Main Group Chemistry Laboratories, School of Chemistry, Newcastle University, Newcastle upon Tyne, NE1 7RU, UK*

### SUPPORTING INFORMATION

#### Contents:

- S2-S20  $^1\text{H}$ ,  $^{13}\text{C}\{^1\text{H}\}$ ,  $^7\text{Li}$ ,  $^{11}\text{B}\{^1\text{H}\}$ ,  $^{31}\text{P}\{^1\text{H}\}$ , and  $^{119}\text{Sn}\{^1\text{H}\}$  NMR spectra, as appropriate, for compounds **2Li**, **2Na**, **2K**, **3Li**, **3Na**, **3K**, and **4Li**.
- S21-S23  $^{11}\text{B}\{^1\text{H}\}$ ,  $^{31}\text{P}\{^1\text{H}\}$ , and  $^{119}\text{Sn}\{^1\text{H}\}$  NMR spectra showing the decomposition of **3Li** in THF.
- S24-S25 Table S1. Crystallographic data for compounds **2Li**, **2Na**, **2K**, **3Li**, **3Na**, **3K**, and **4Li**.
- S26 Figure S1. Polymeric structure of **2K**, with selected bond lengths and angles.
- S27-S30 Figures S2-S8. Asymmetric units of **2Li**, **2Na**, **2K**, **3Li**, **3Na**, **3K**, and **4Li**, with 40% probability ellipsoids.

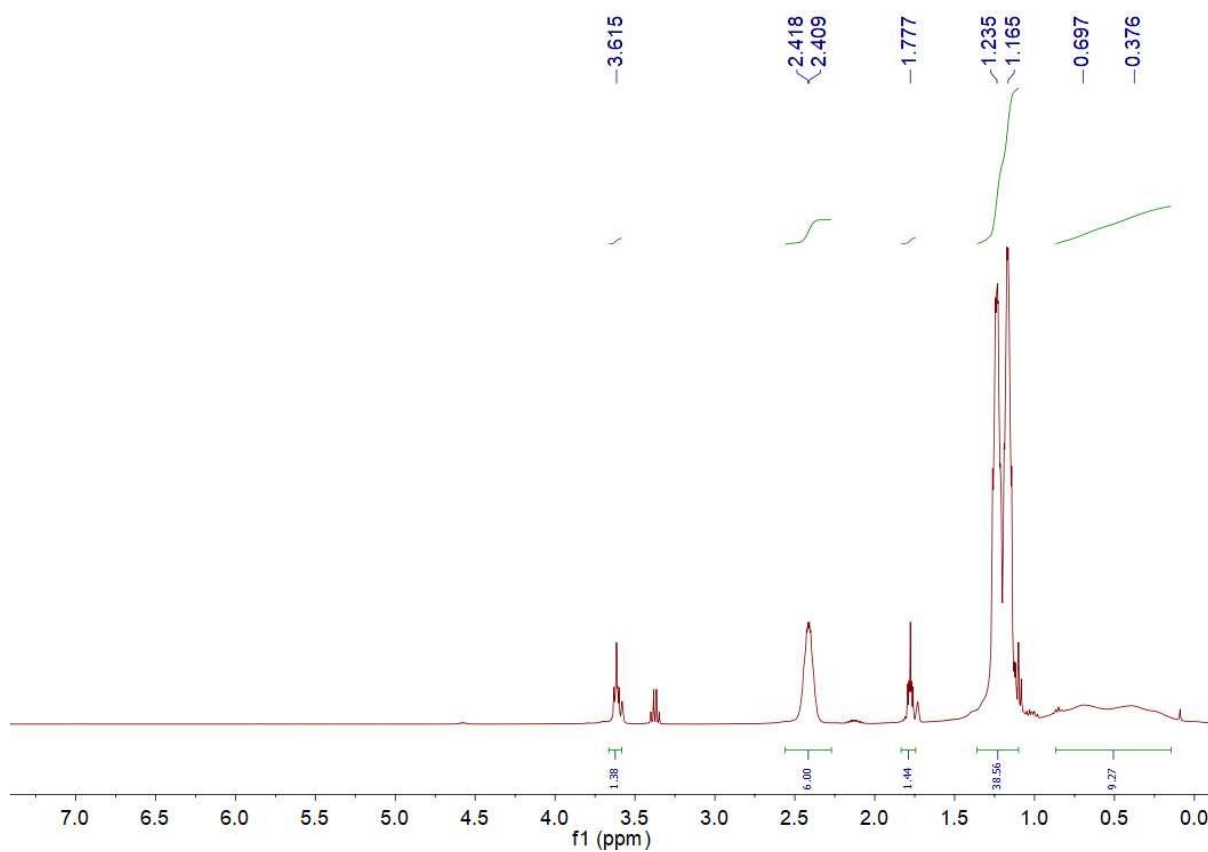

$^1\text{H}$  NMR spectrum of **2Li** in  $d_8$ -THF.

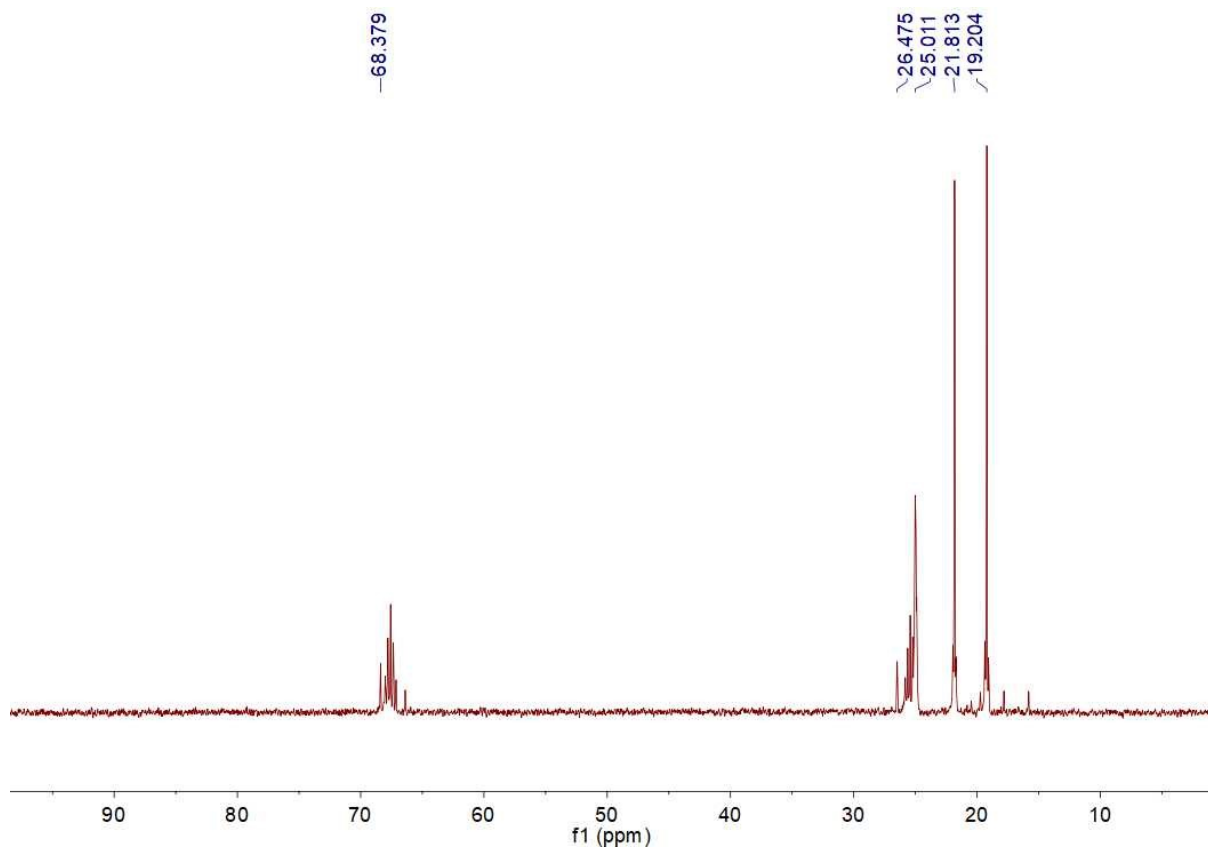

$^{13}\text{C}\{^1\text{H}\}$  NMR spectrum of **2Li** in  $d_8$ -THF.

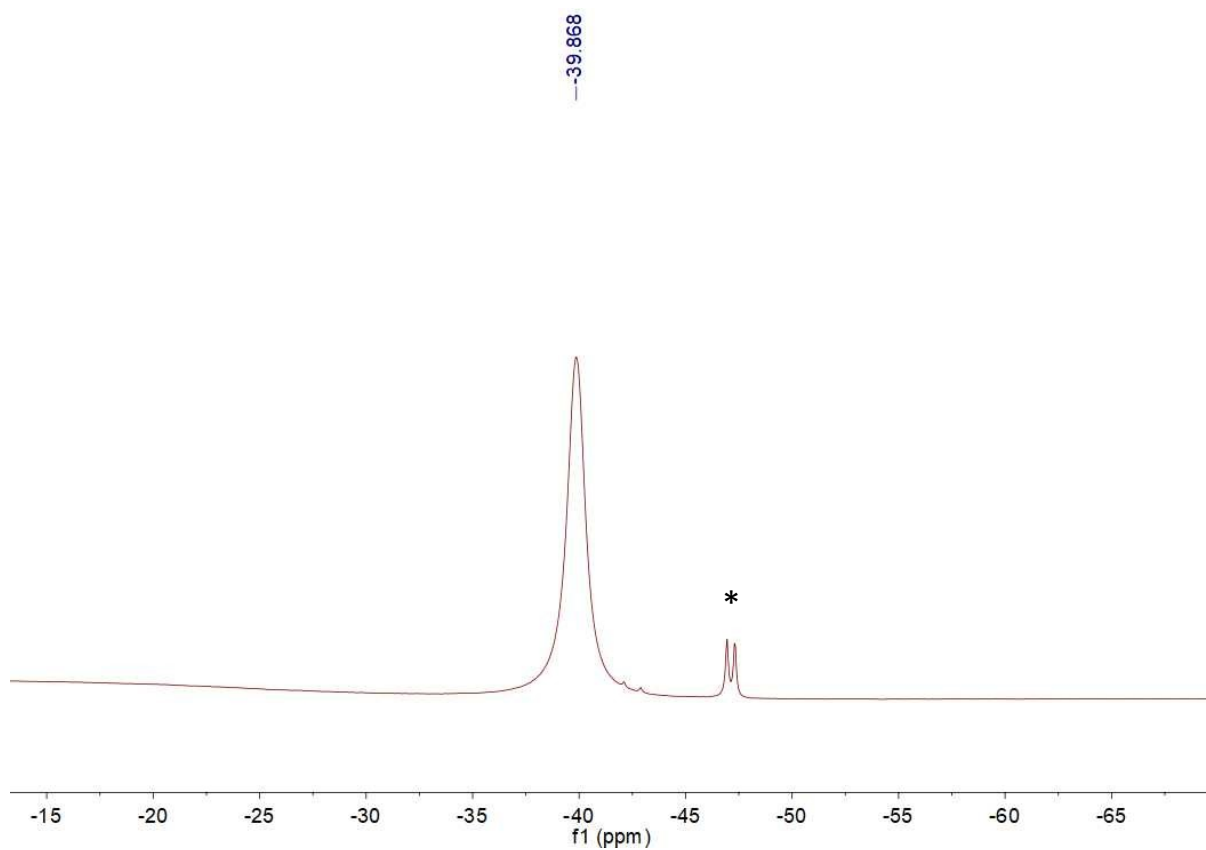

$^{11}\text{B}\{^1\text{H}\}$  NMR spectrum of **2Li** in  $d_8$ -THF (\*free phosphine-borane **2H** due to partial hydrolysis during sample preparation).

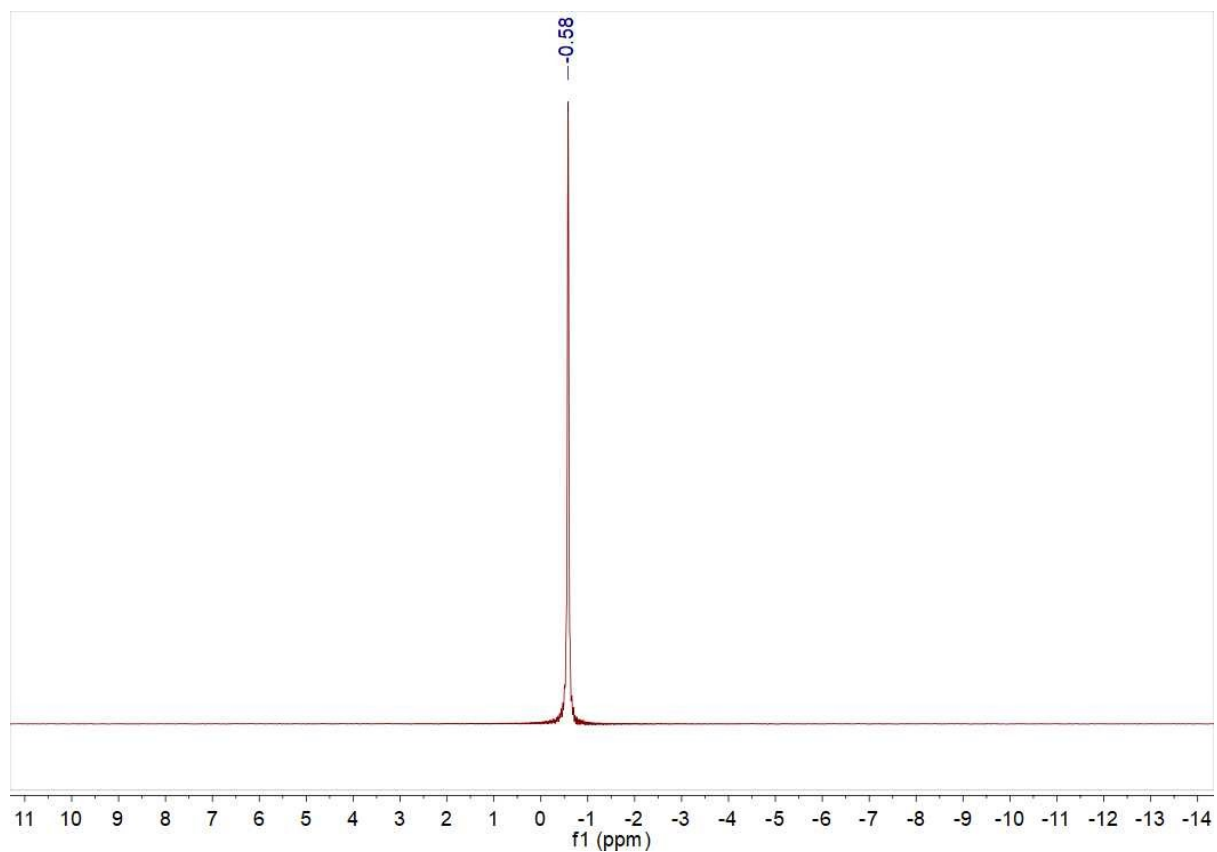

$^7\text{Li}$  NMR spectrum of **2Li** in  $d_8$ -THF.

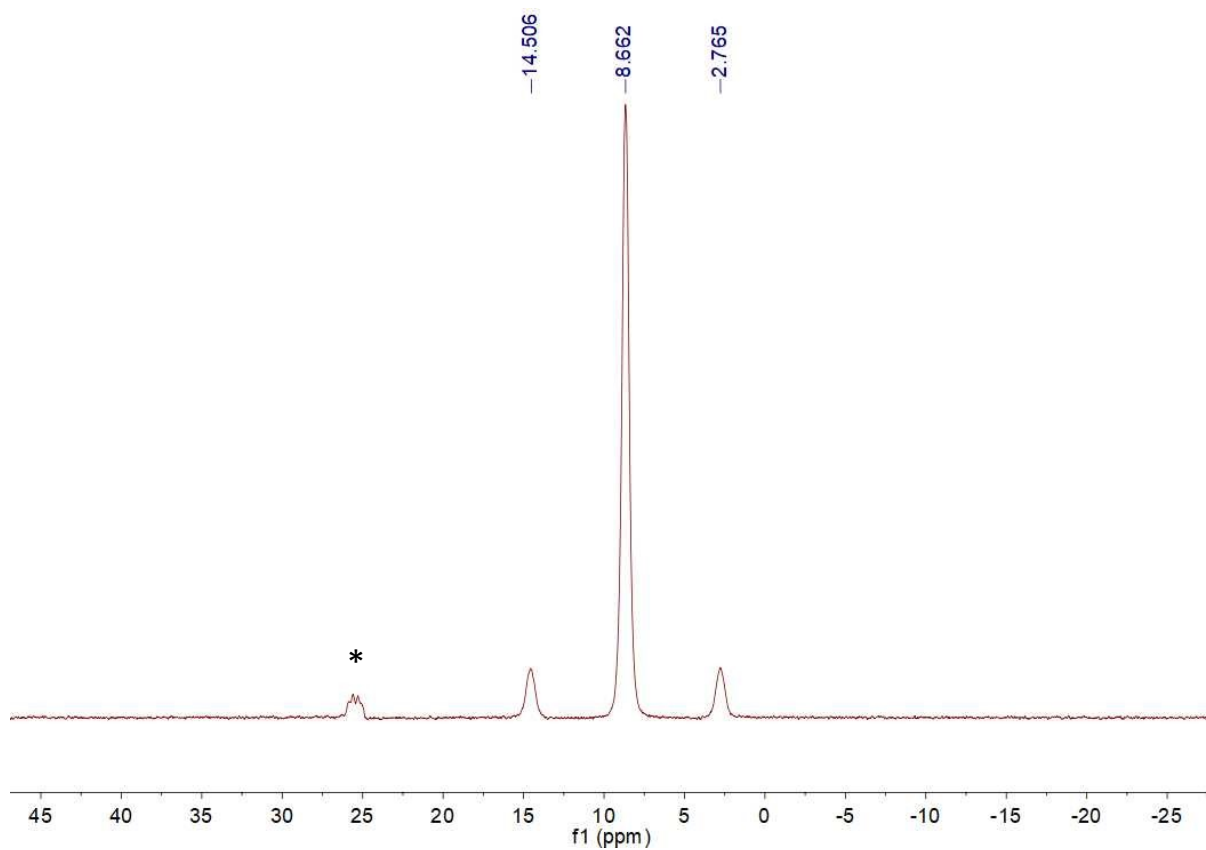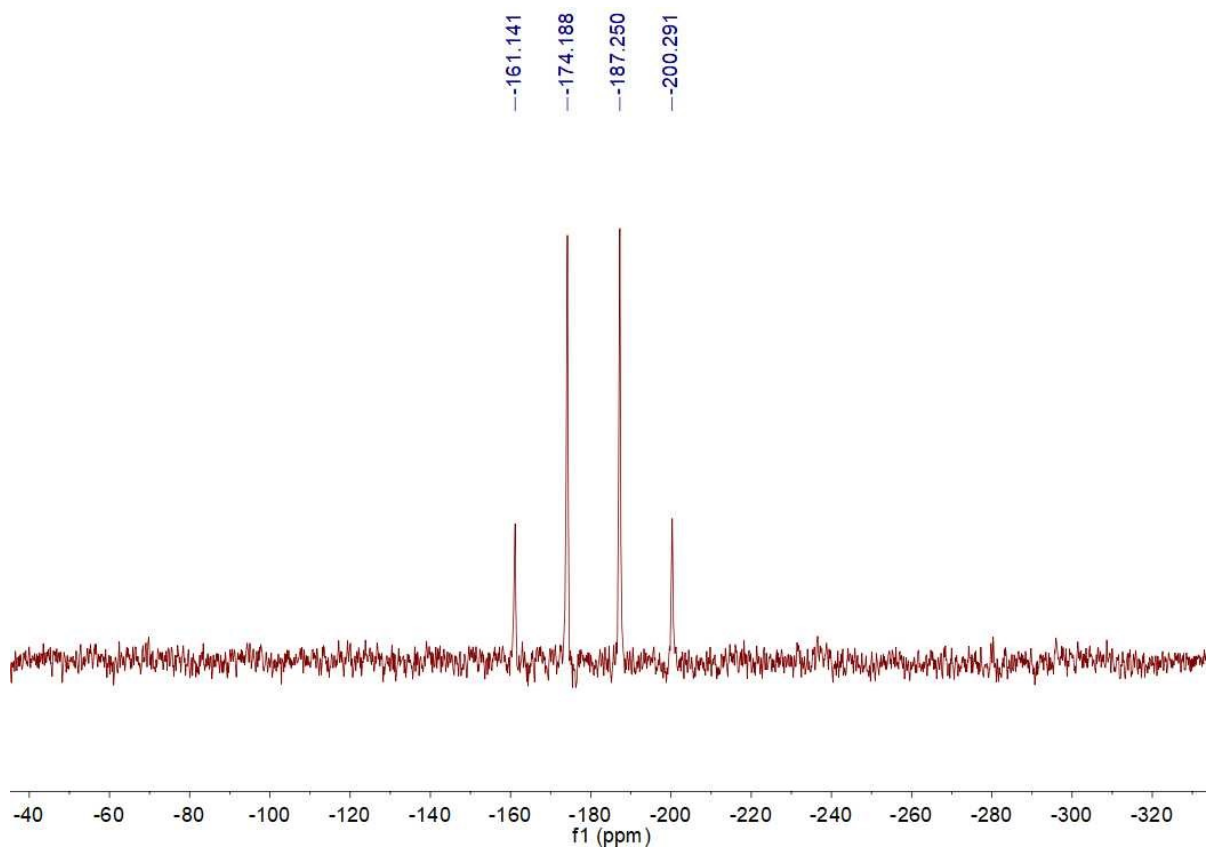

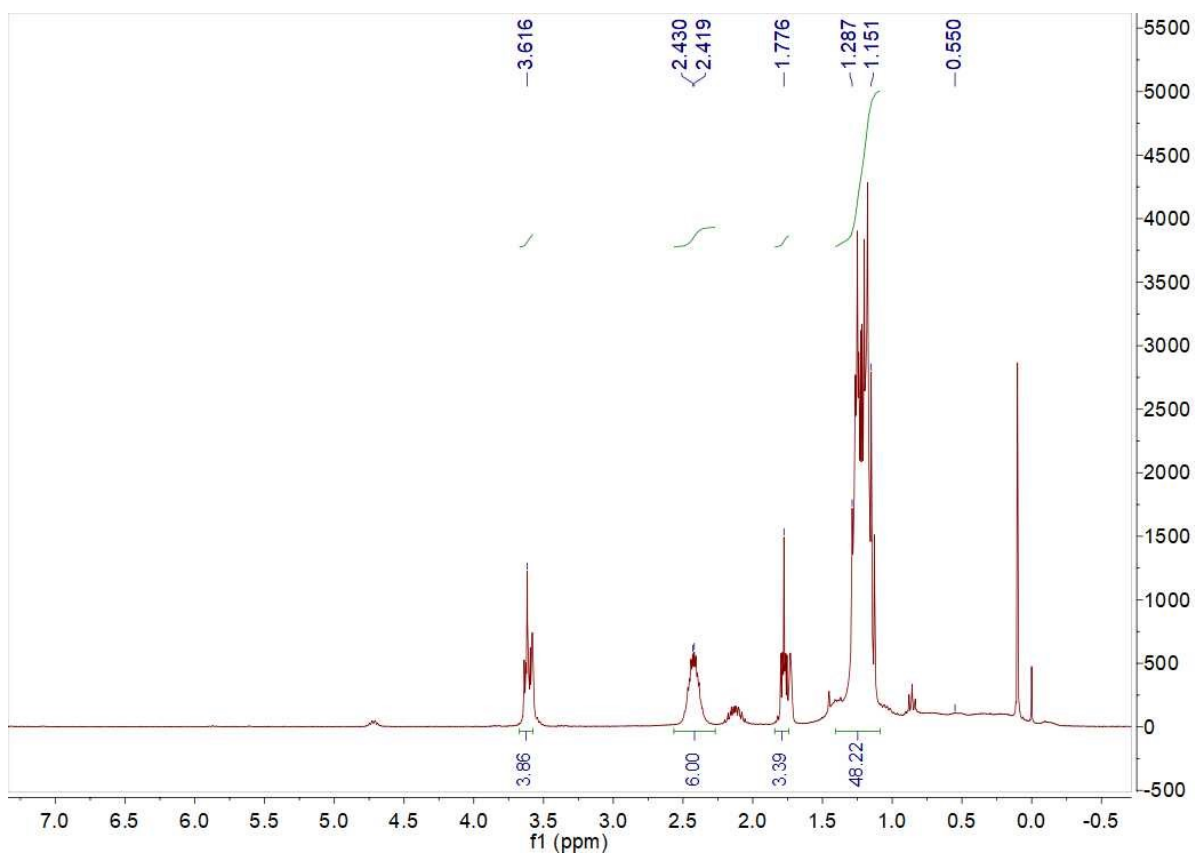

$^1\text{H}$  NMR spectrum of **2Na** in  $d_8$ -THF.

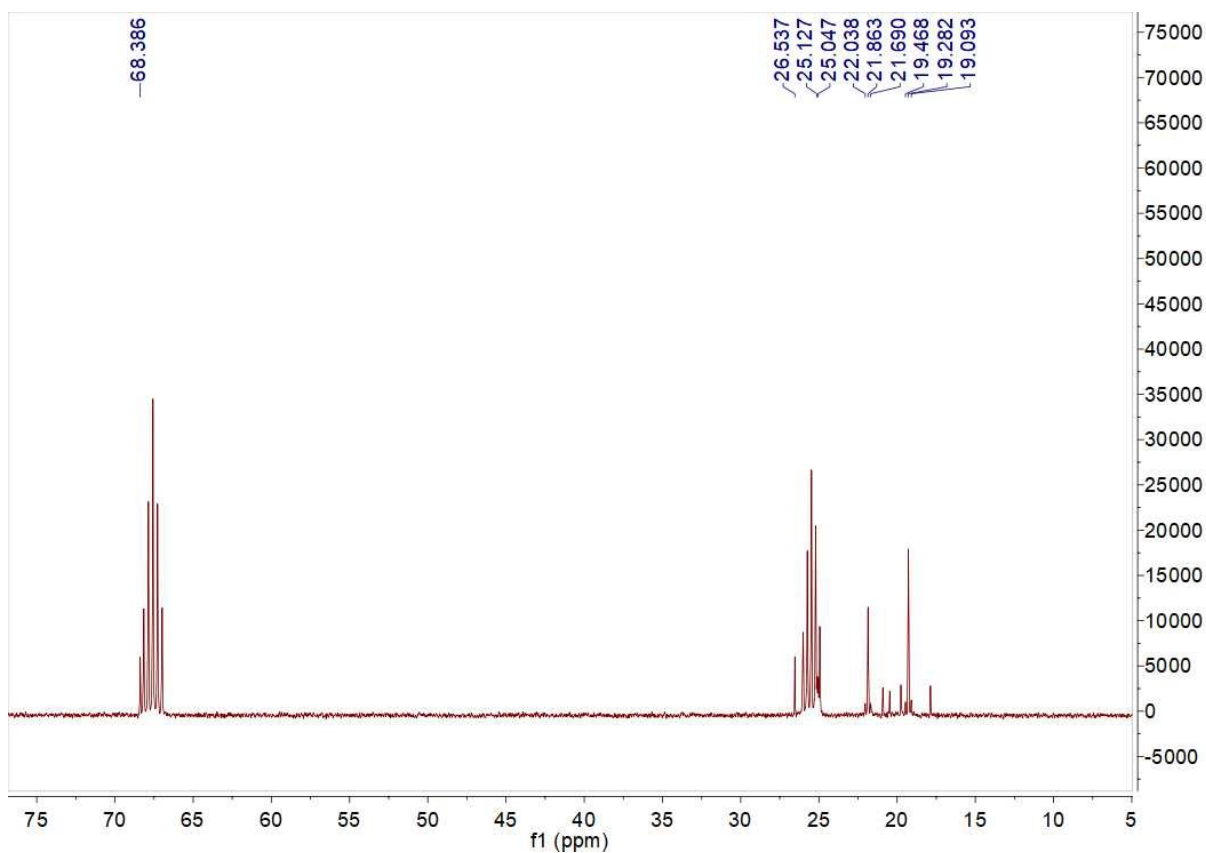

$^{13}\text{C}\{^1\text{H}\}$  NMR spectrum of **2Na** in  $d_8$ -THF.

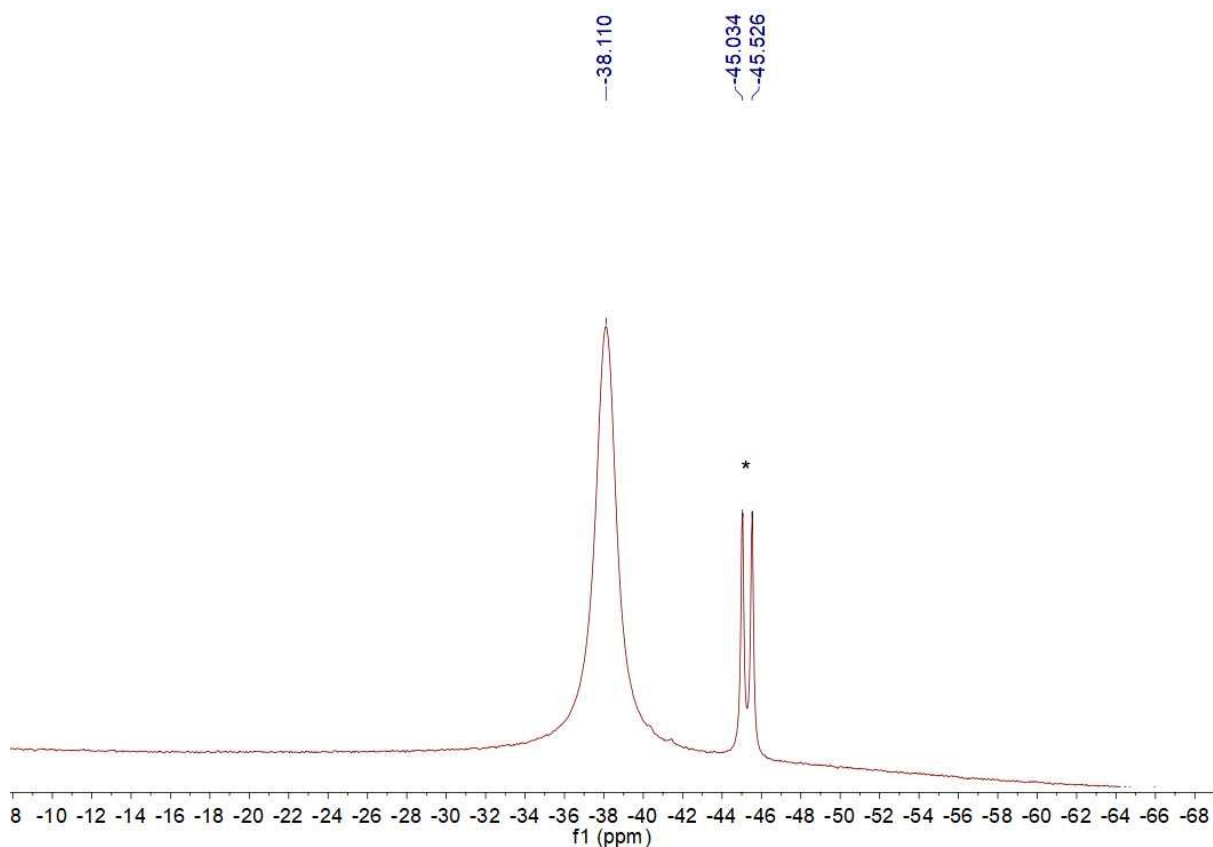

$^{11}\text{B}\{^1\text{H}\}$  NMR spectrum of **2Na** in  $d_8$ -THF (\*free phosphine-borane **2H** due to partial hydrolysis during sample preparation).

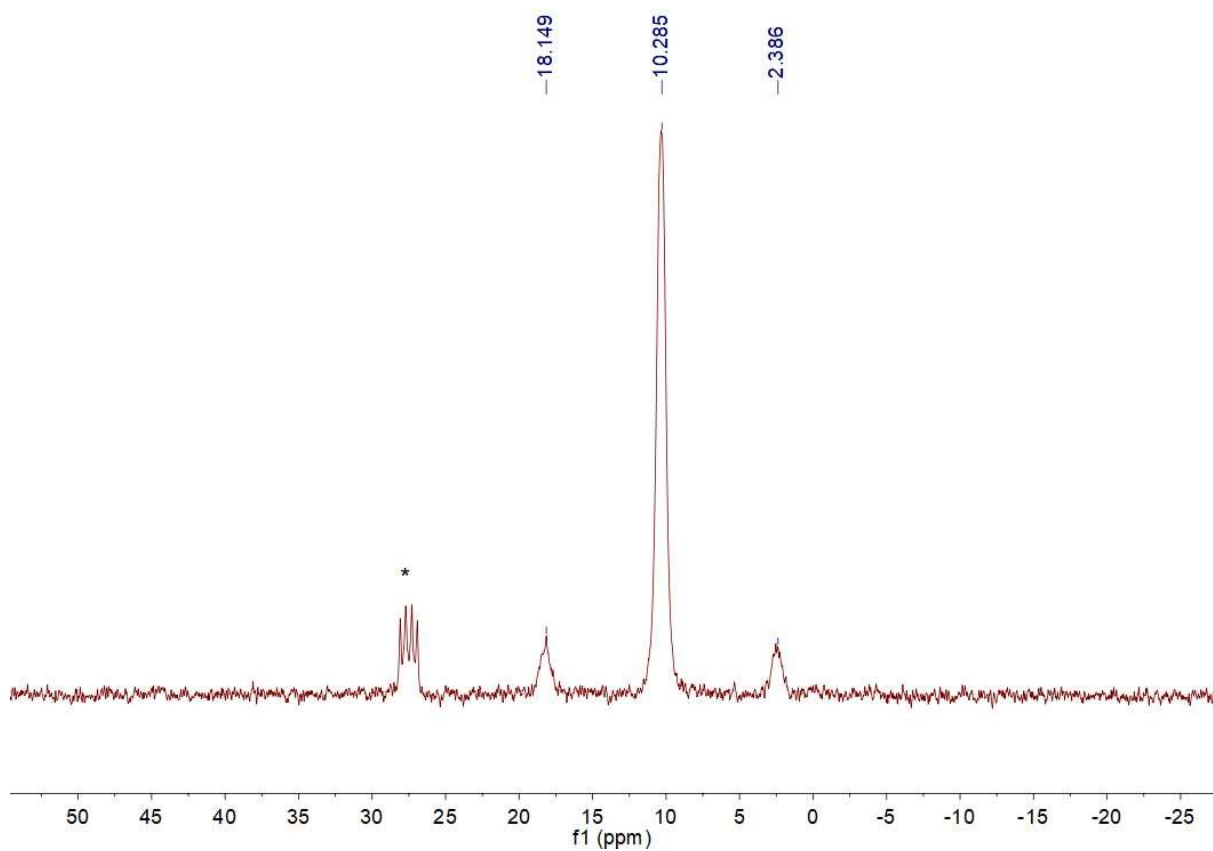

$^{31}\text{P}\{^1\text{H}\}$  NMR spectrum of **2Na** in  $d_8$ -THF (\*free phosphine-borane **2H** due to partial hydrolysis during sample preparation).

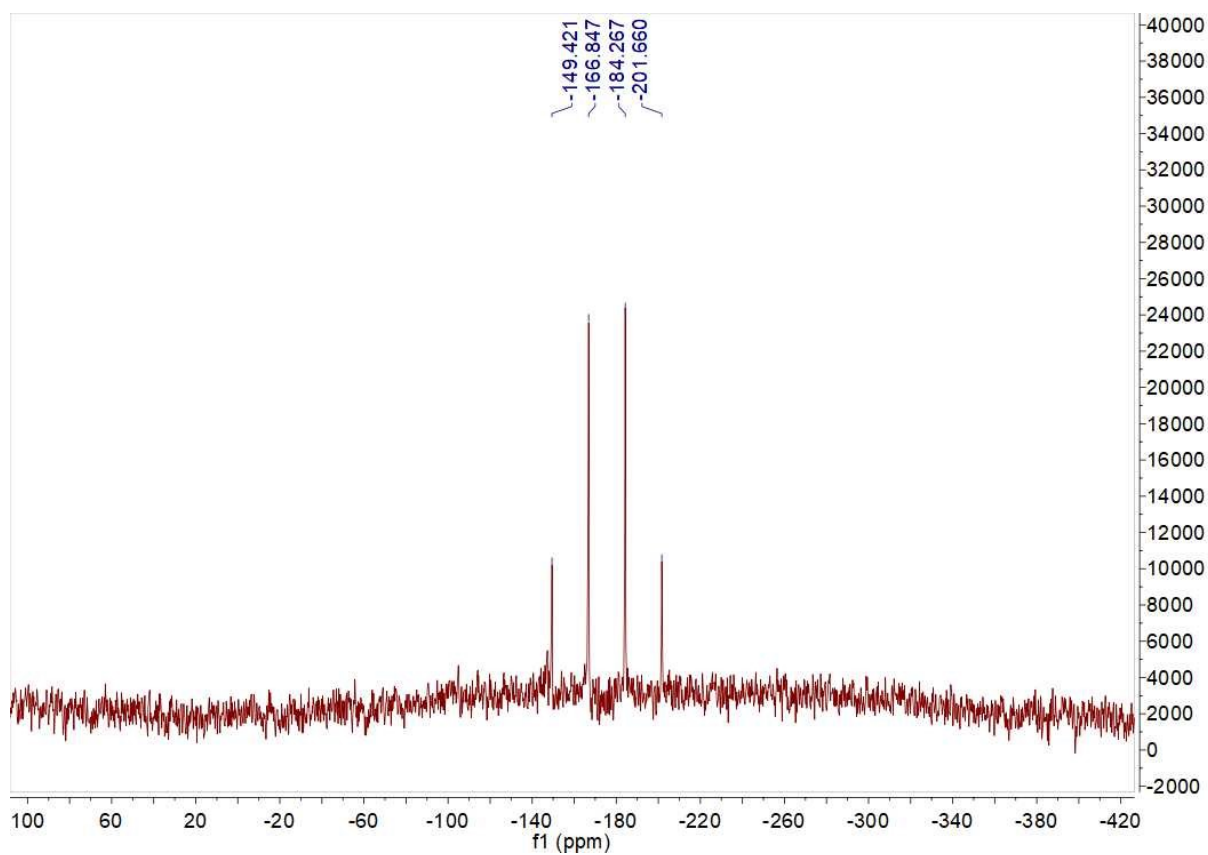

$^{119}\text{Sn}\{^1\text{H}\}$  NMR spectrum of **2Na** in  $d_8$ -THF.

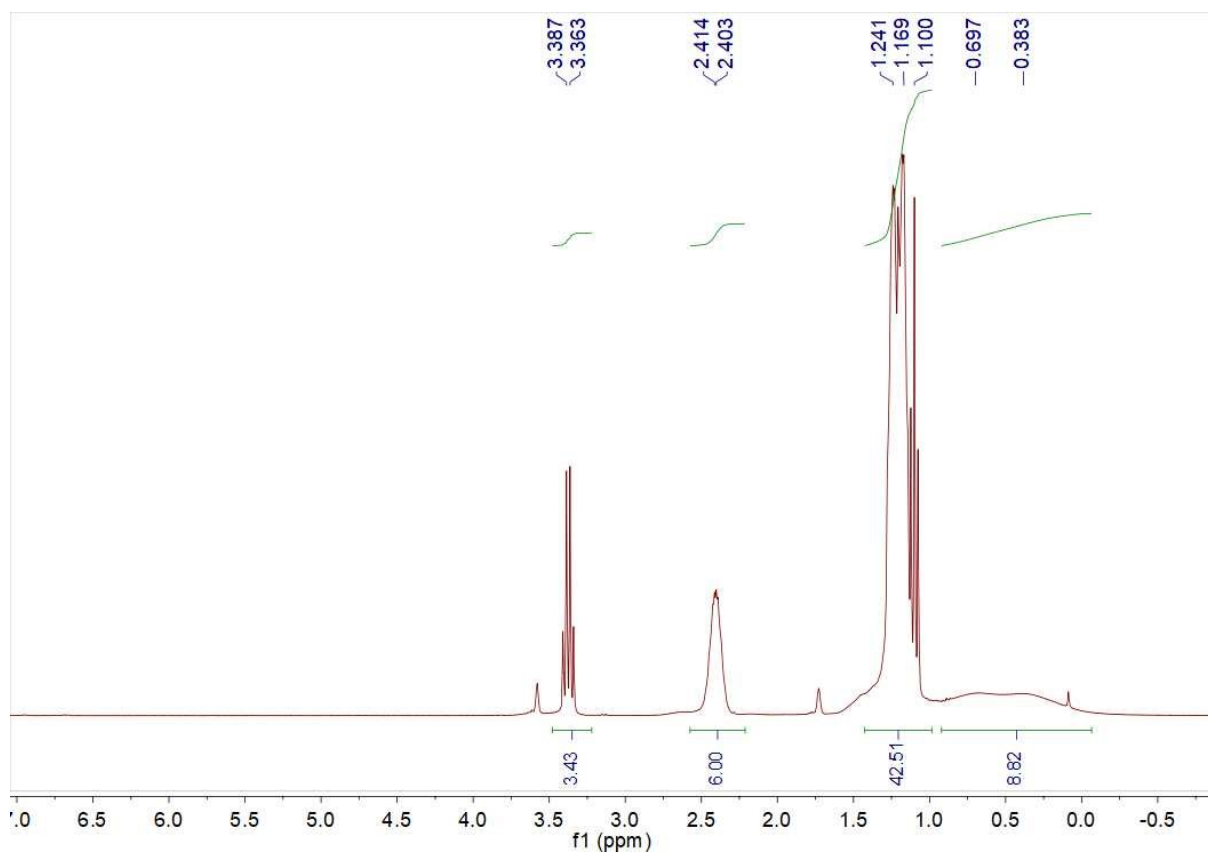

$^1\text{H}$  NMR spectrum of **2K** in  $d_8$ -THF.

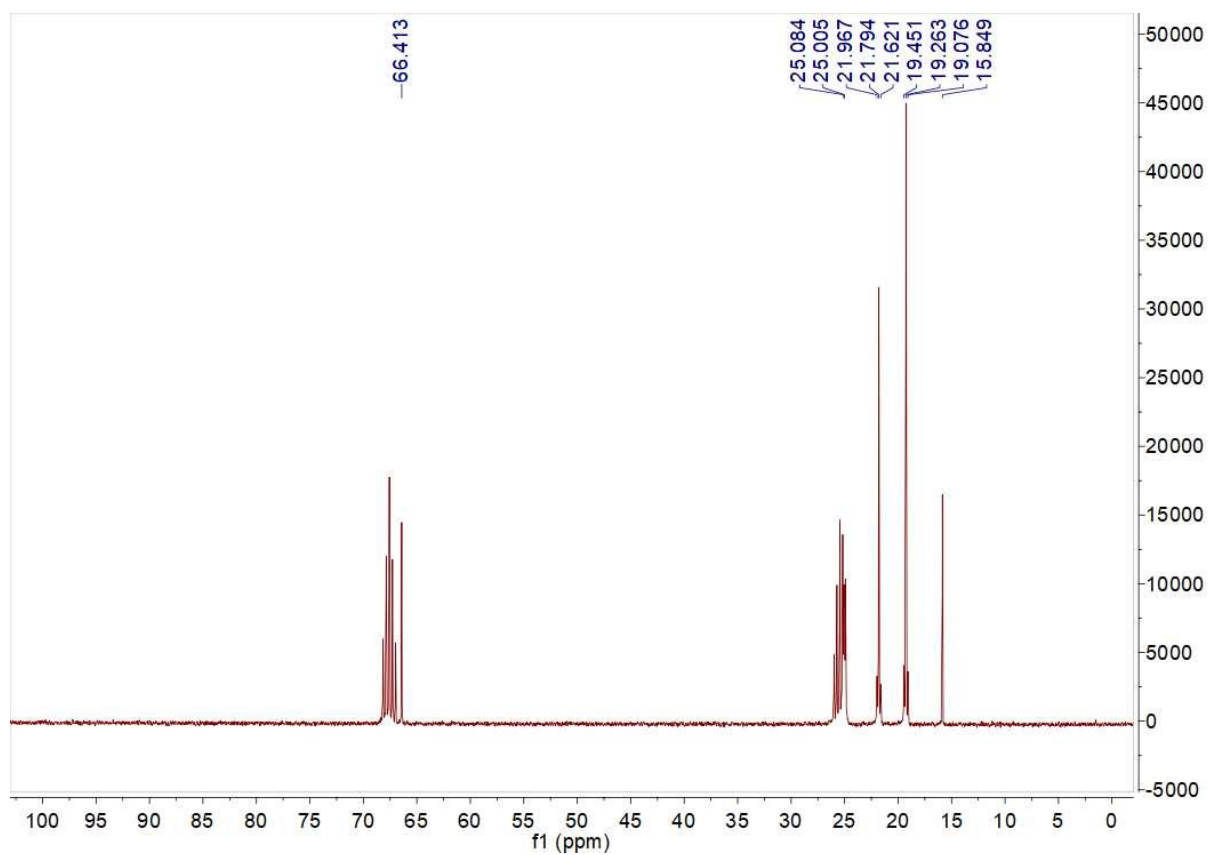

<sup>13</sup>C{<sup>1</sup>H} NMR spectrum of **2K** in *d*<sub>8</sub>-THF.

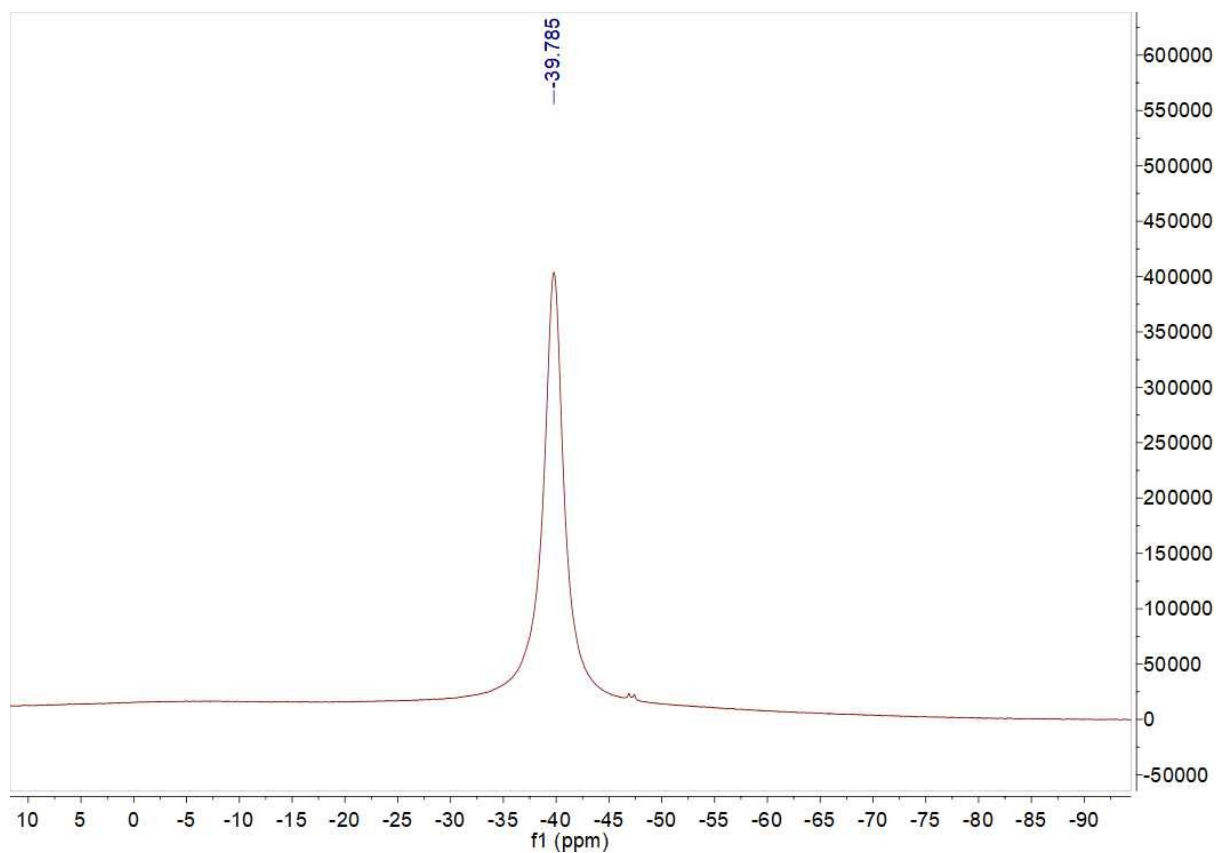

<sup>11</sup>B{<sup>1</sup>H} NMR spectrum of **2K** in *d*<sub>8</sub>-THF.



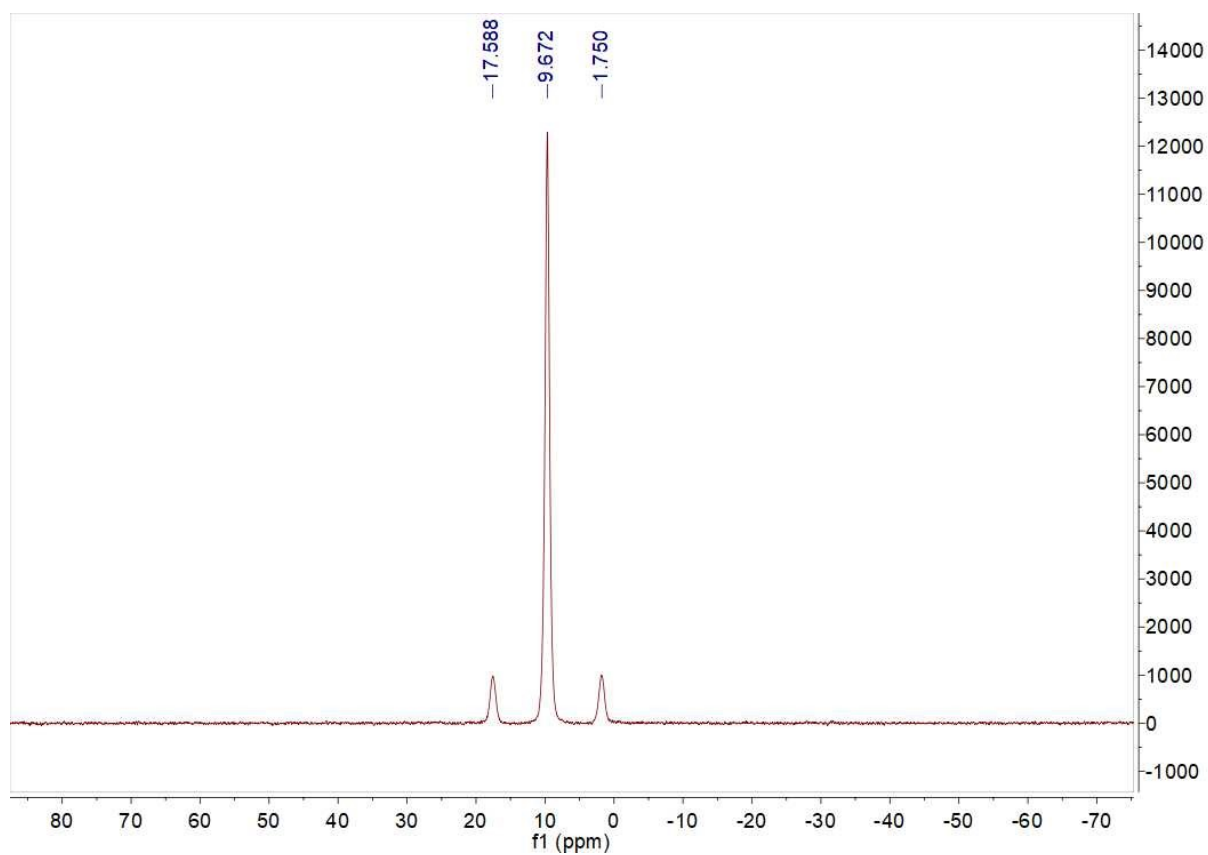

$^{31}\text{P}\{^1\text{H}\}$  NMR spectrum of **2K** in  $d_8$ -THF.

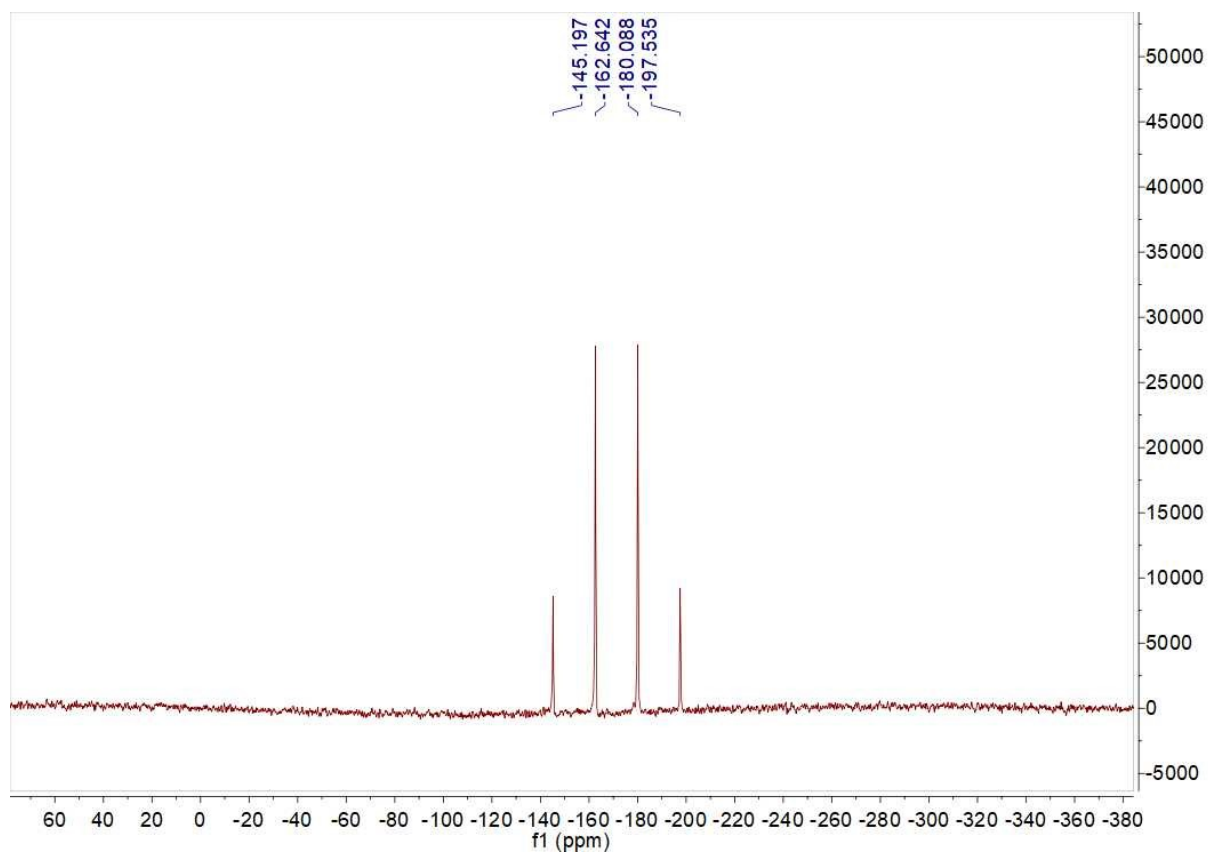

$^{119}\text{Sn}\{^1\text{H}\}$  NMR spectrum of **2K** in  $d_8$ -THF.

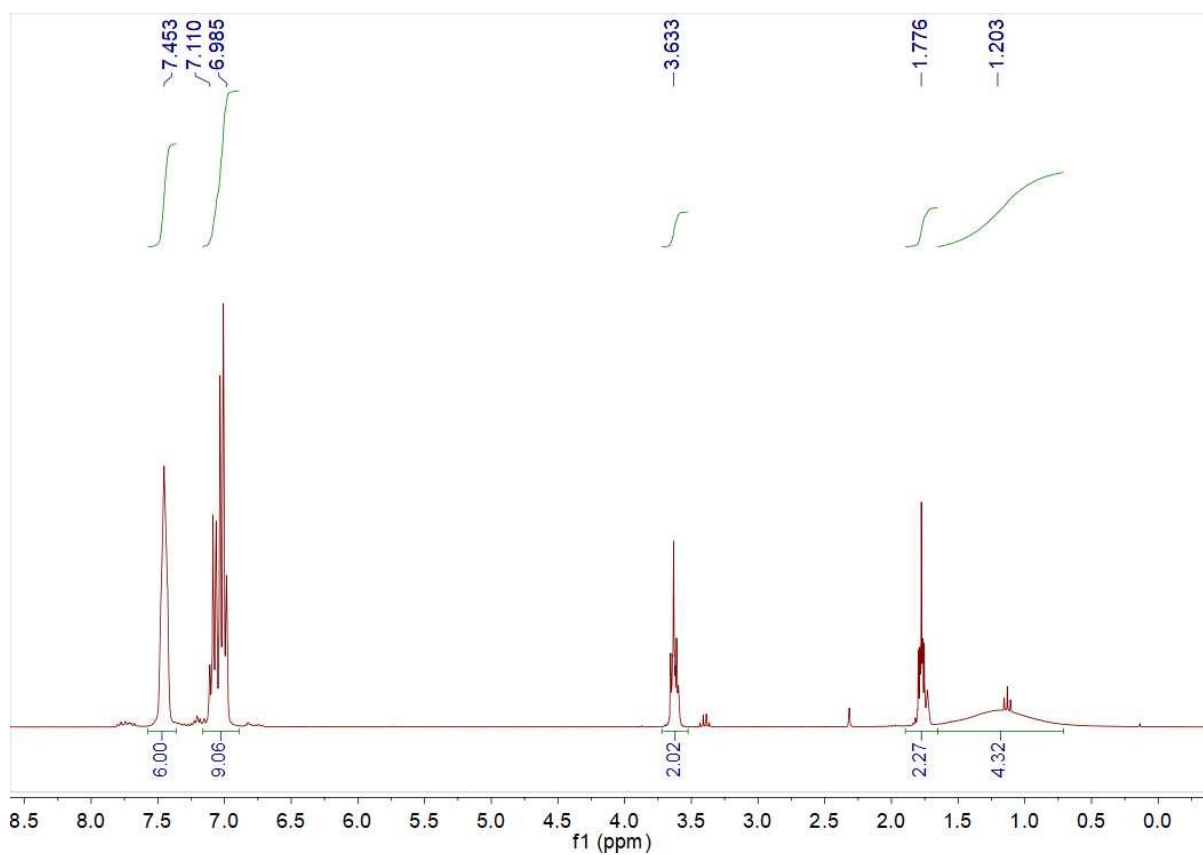

$^1\text{H}$  NMR spectrum of **3Li** in  $d_8$ -THF.

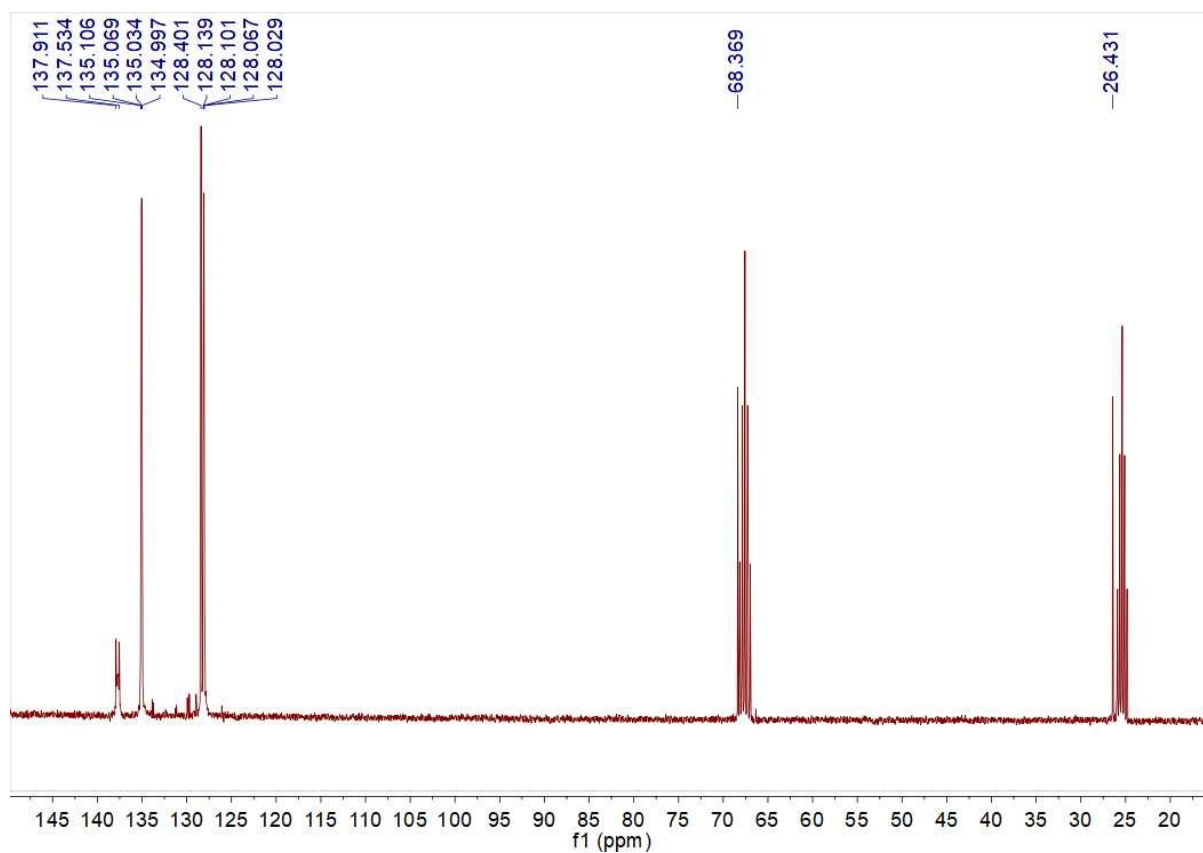

$^{13}\text{C}\{^1\text{H}\}$  NMR spectrum of **3Li** in  $d_8$ -THF.

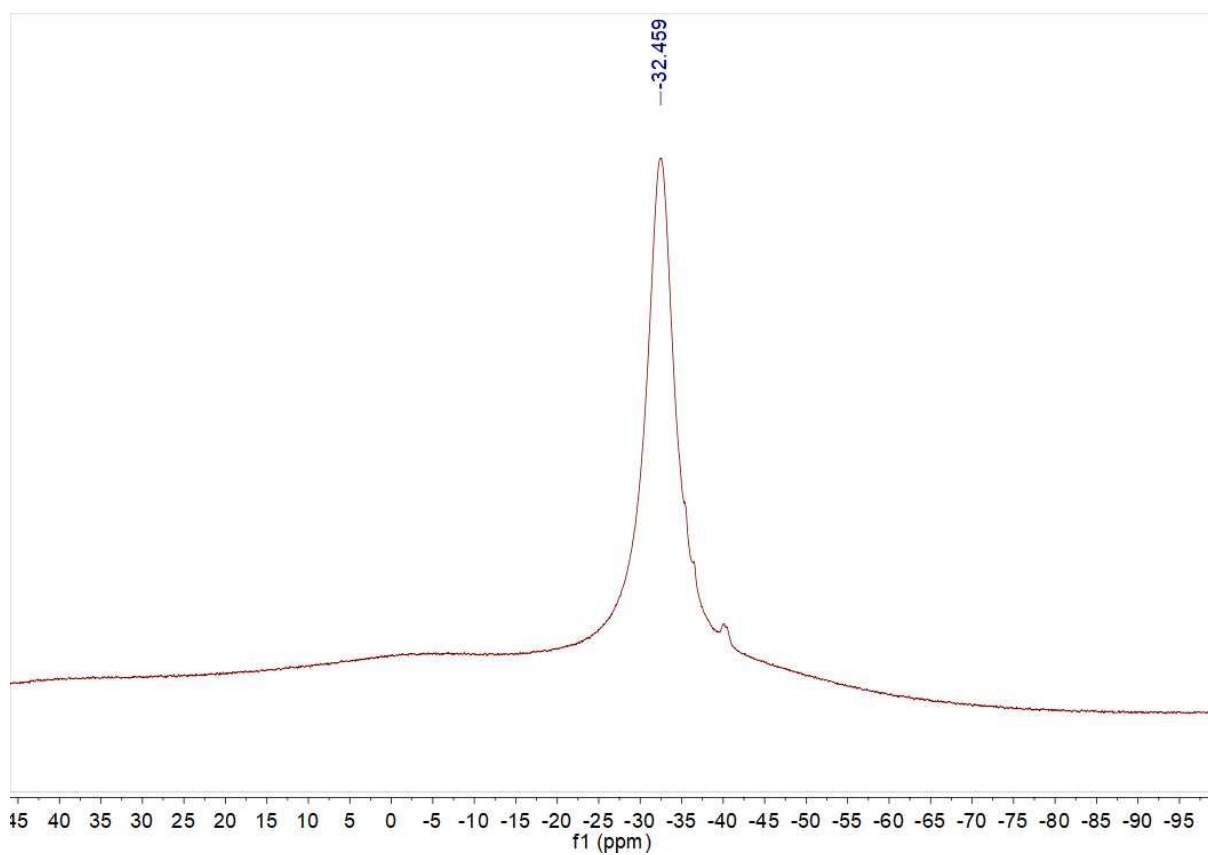

$^{11}\text{B}\{^1\text{H}\}$  NMR spectrum of **3Li** in  $d_8$ -THF.

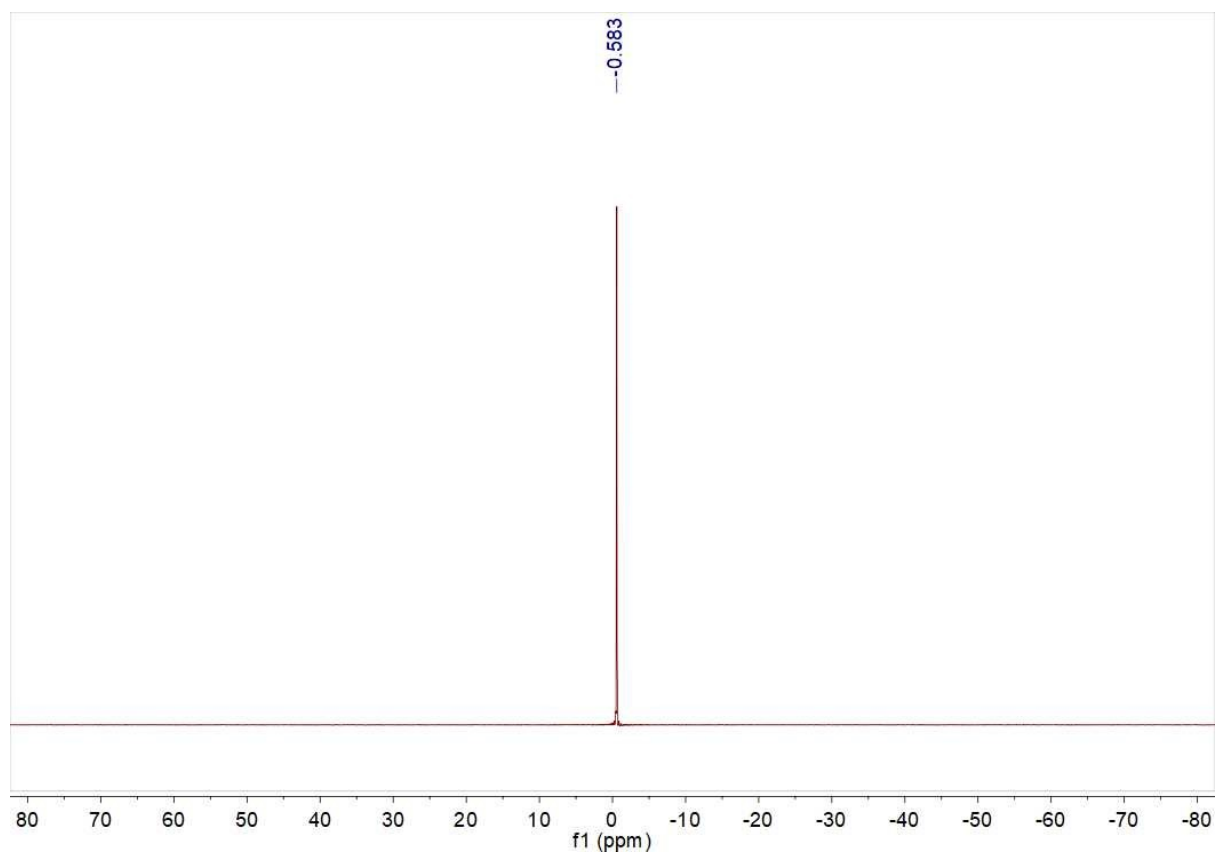

$^7\text{Li}\{^1\text{H}\}$  NMR spectrum of **3Li** in  $d_8$ -THF.

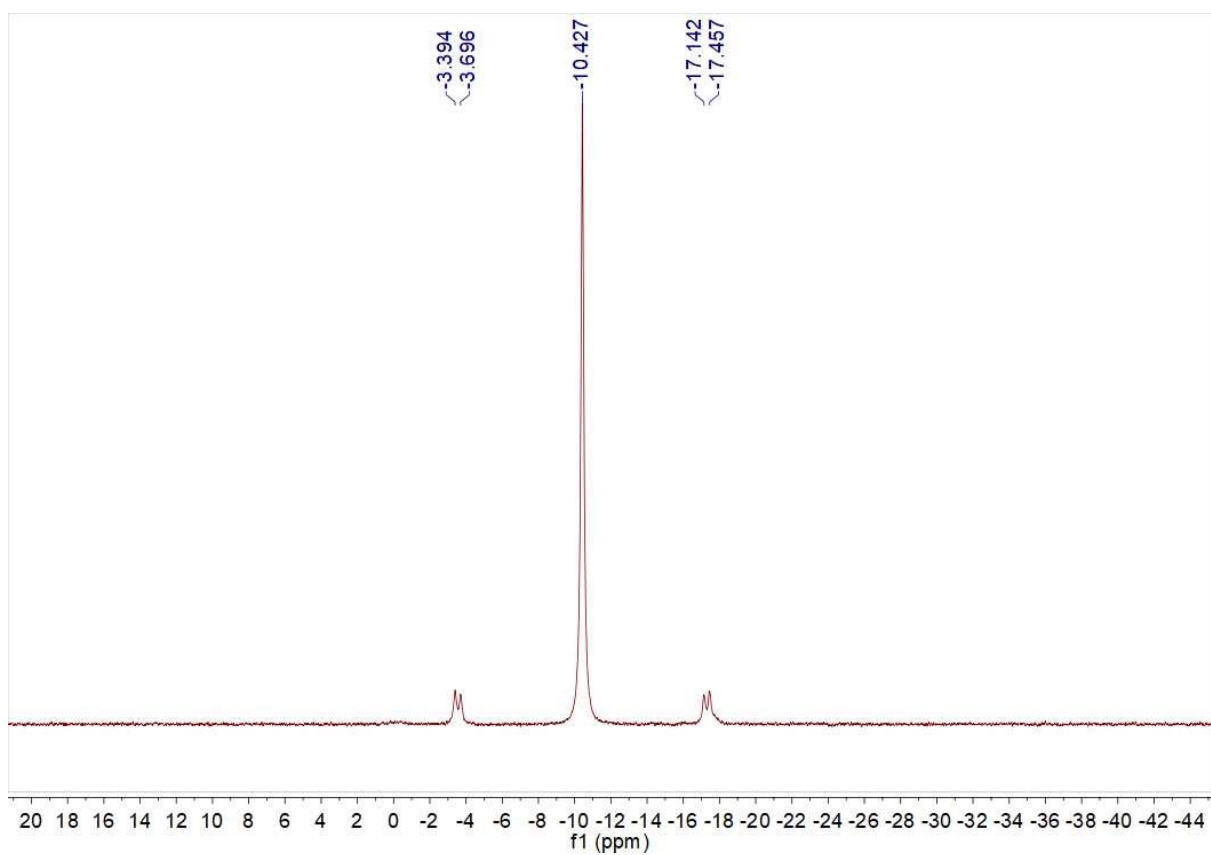

$^{31}\text{P}\{^1\text{H}\}$  NMR spectrum of **3Li** in  $d_8$ -THF.

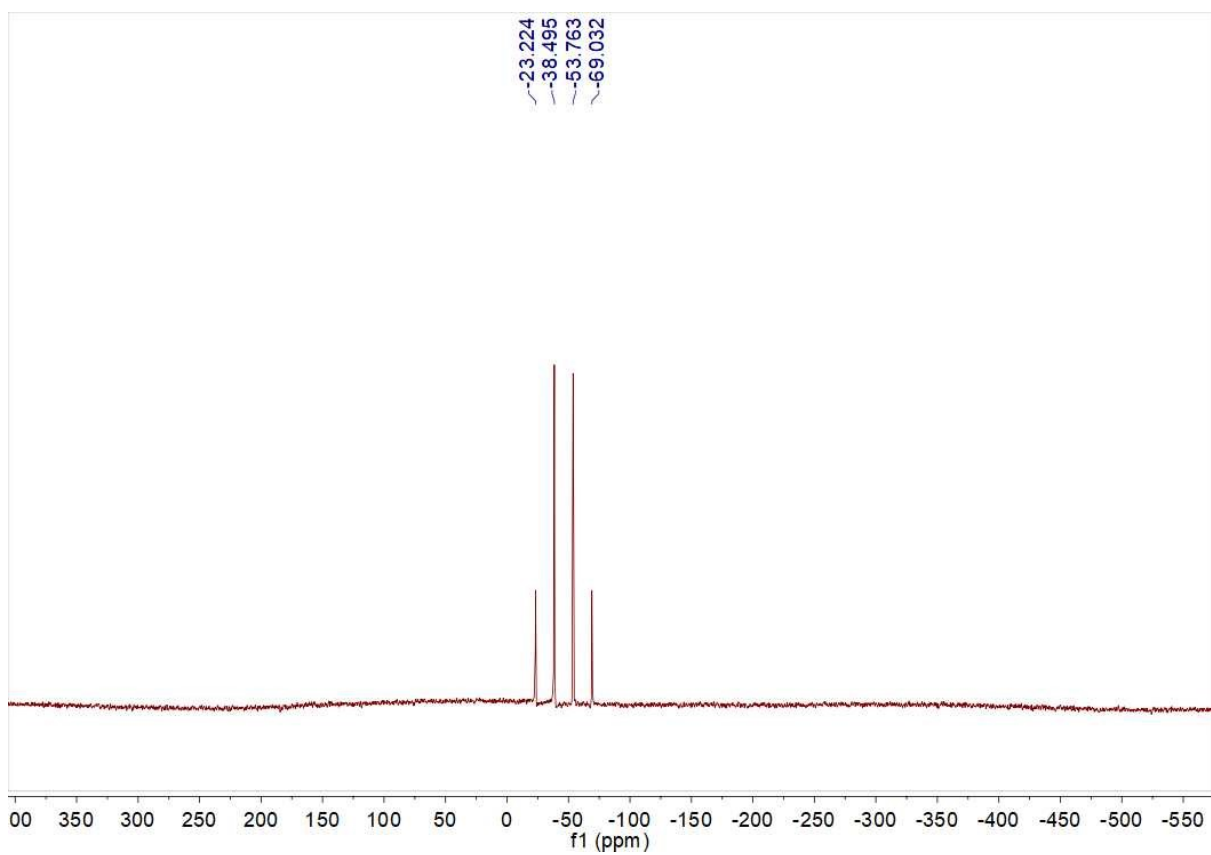

$^{119}\text{Sn}\{^1\text{H}\}$  NMR spectrum of **3Li** in  $d_8$ -THF.

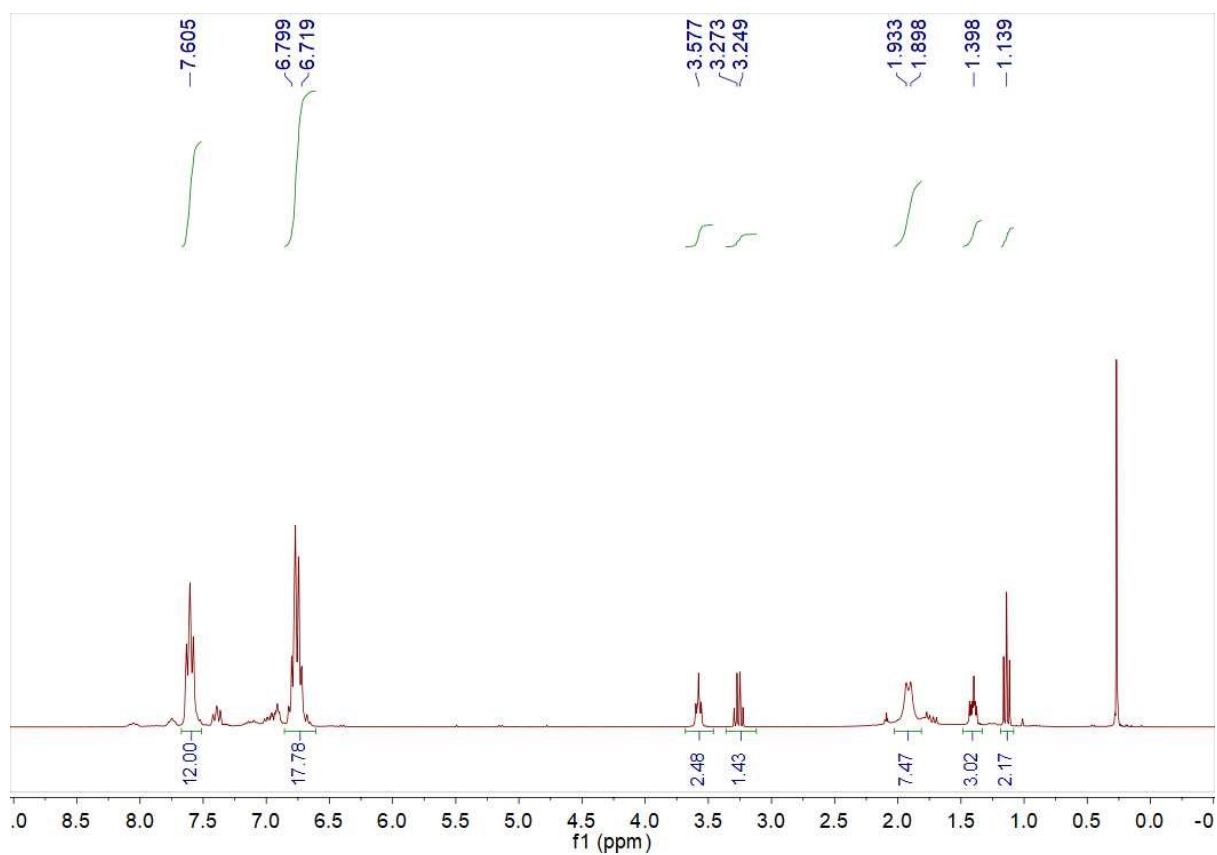

$^1\text{H}\{^{11}\text{B}\}$  NMR spectrum of **3Na** in  $d_8$ -toluene.

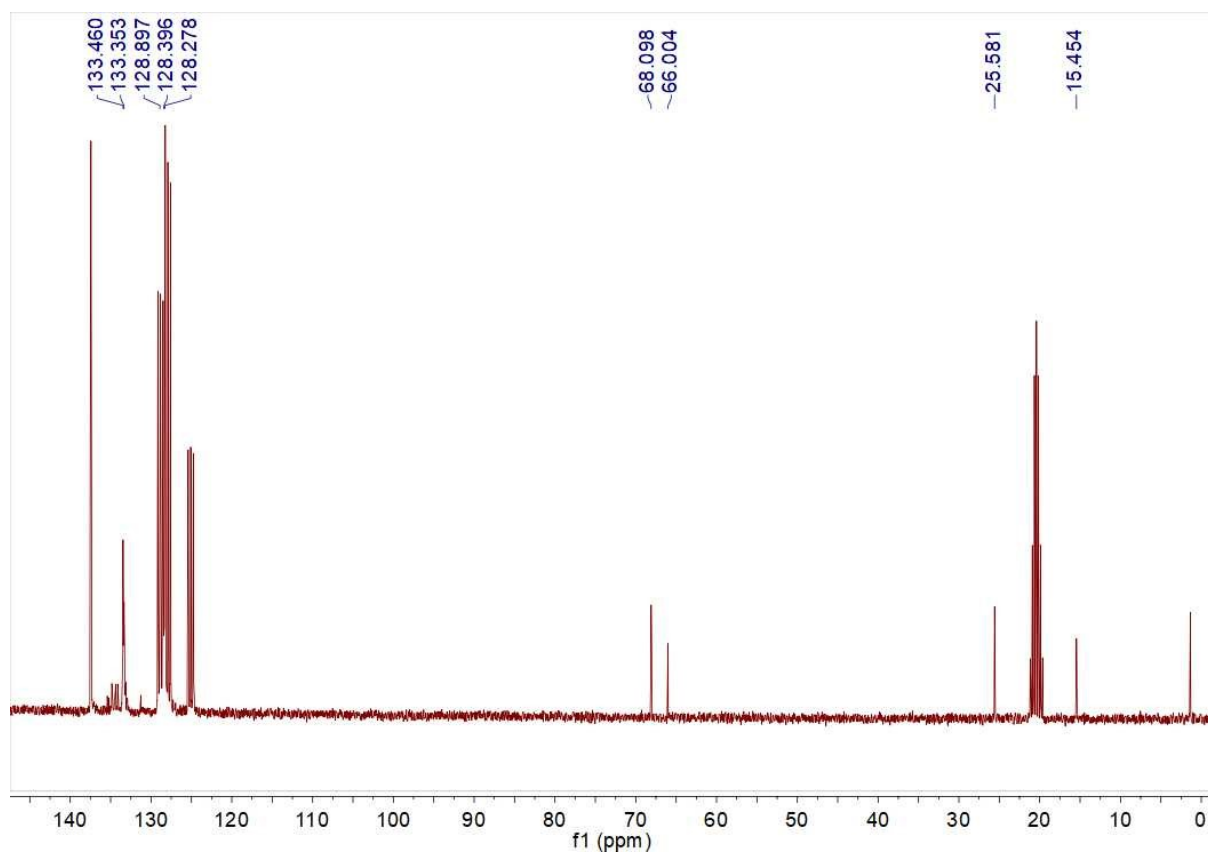

$^{13}\text{C}\{^1\text{H}\}$  NMR spectrum of **3Na** in  $d_8$ -toluene.

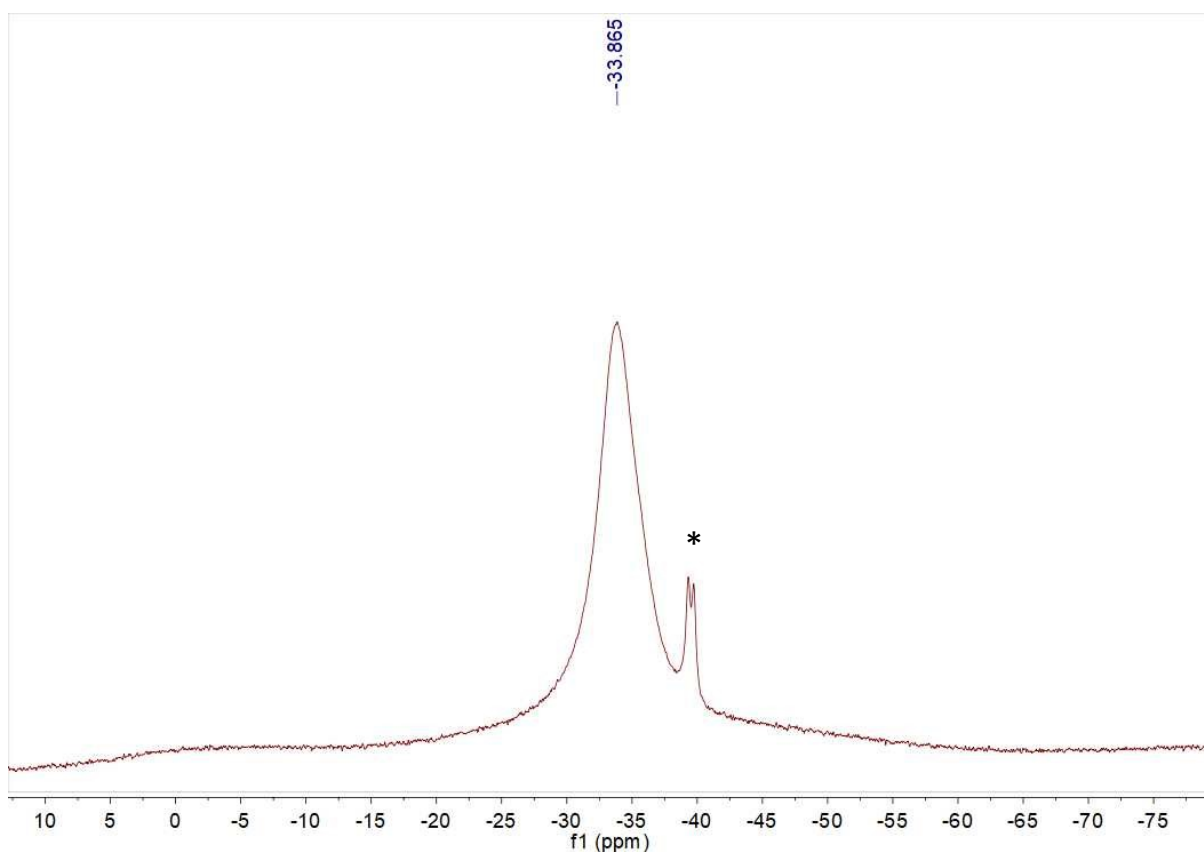

$^{11}\text{B}\{^1\text{H}\}$  NMR spectrum of **3Na** in  $d_8$ -toluene toluene (\*free phosphine-borane **3H** due to partial hydrolysis during sample preparation).

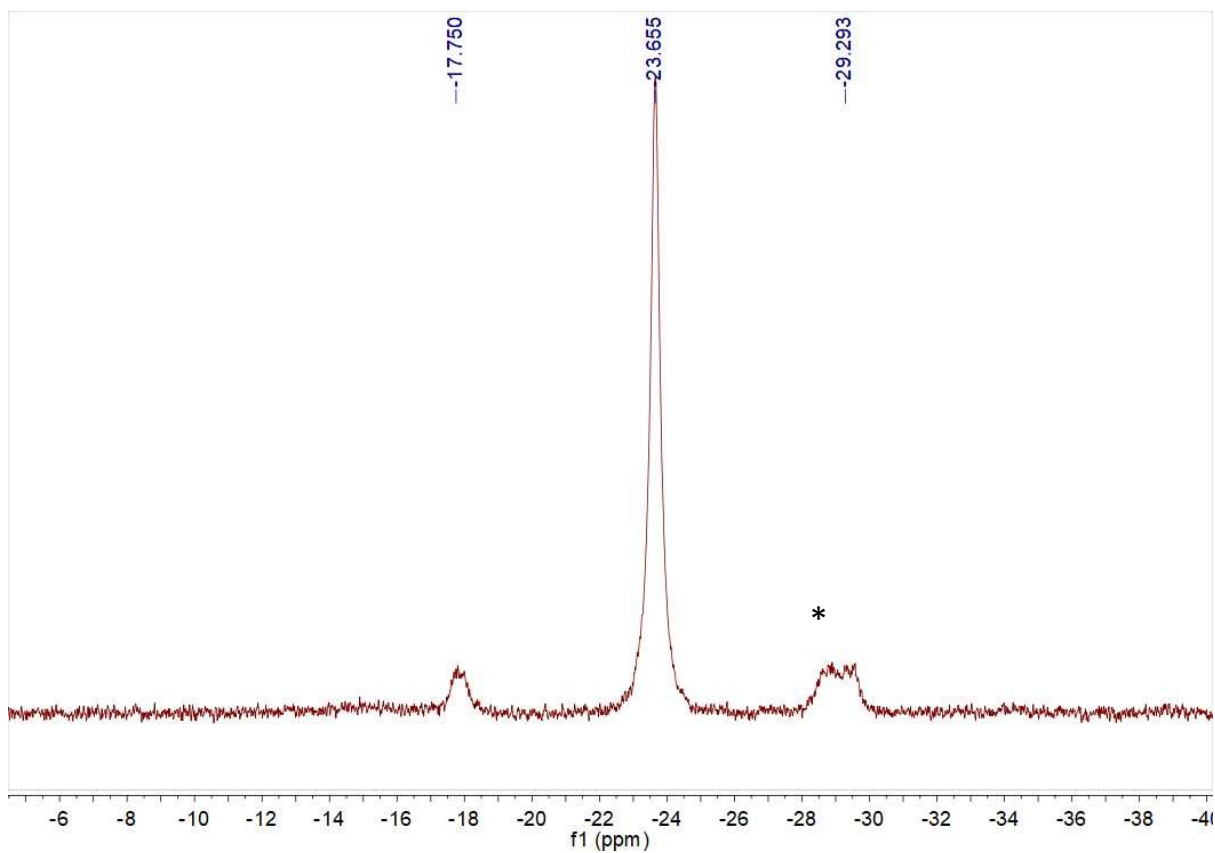

$^{31}\text{P}\{^1\text{H}\}$  NMR spectrum of **3Na** in  $d_8$ -toluene toluene (\*free phosphine-borane **3H** due to partial hydrolysis during sample preparation).

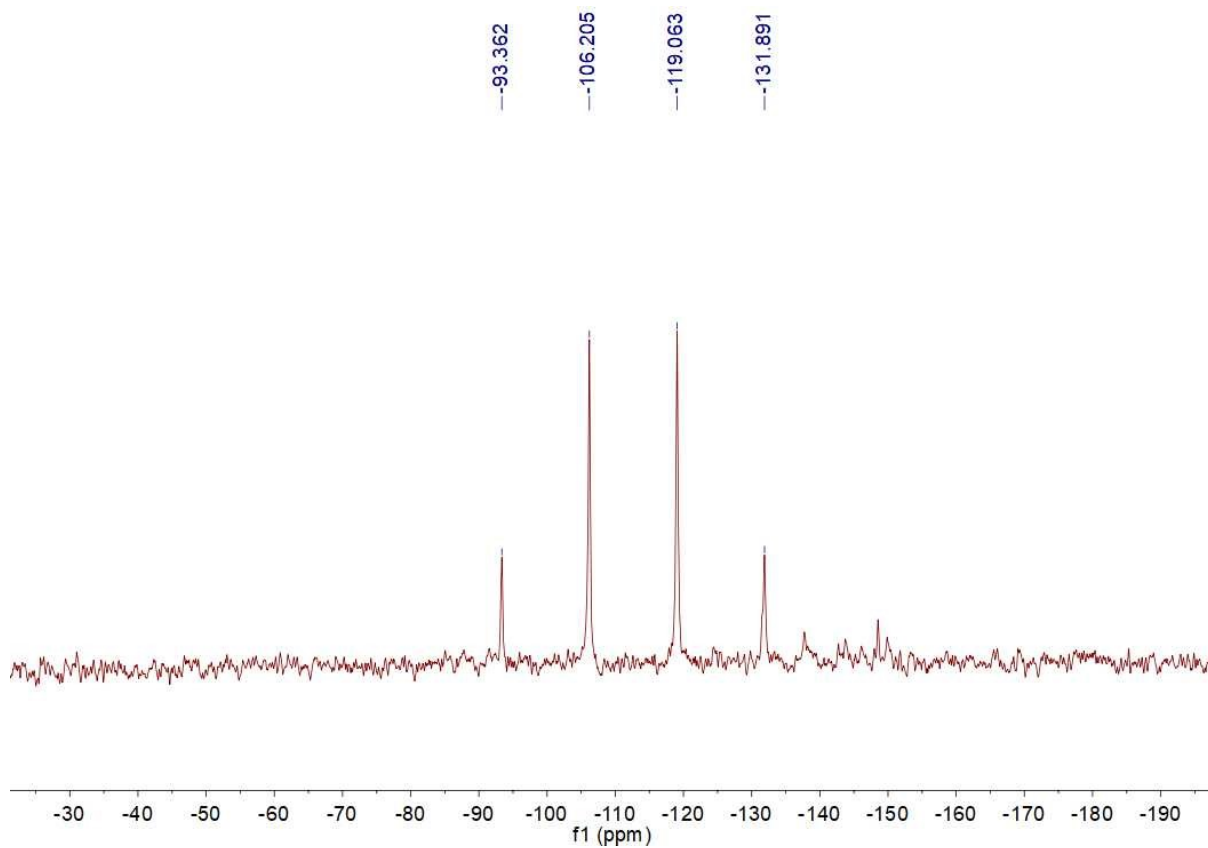

$^{119}\text{Sn}\{^1\text{H}\}$  NMR spectrum of **3Na** in  $d_8$ -toluene.

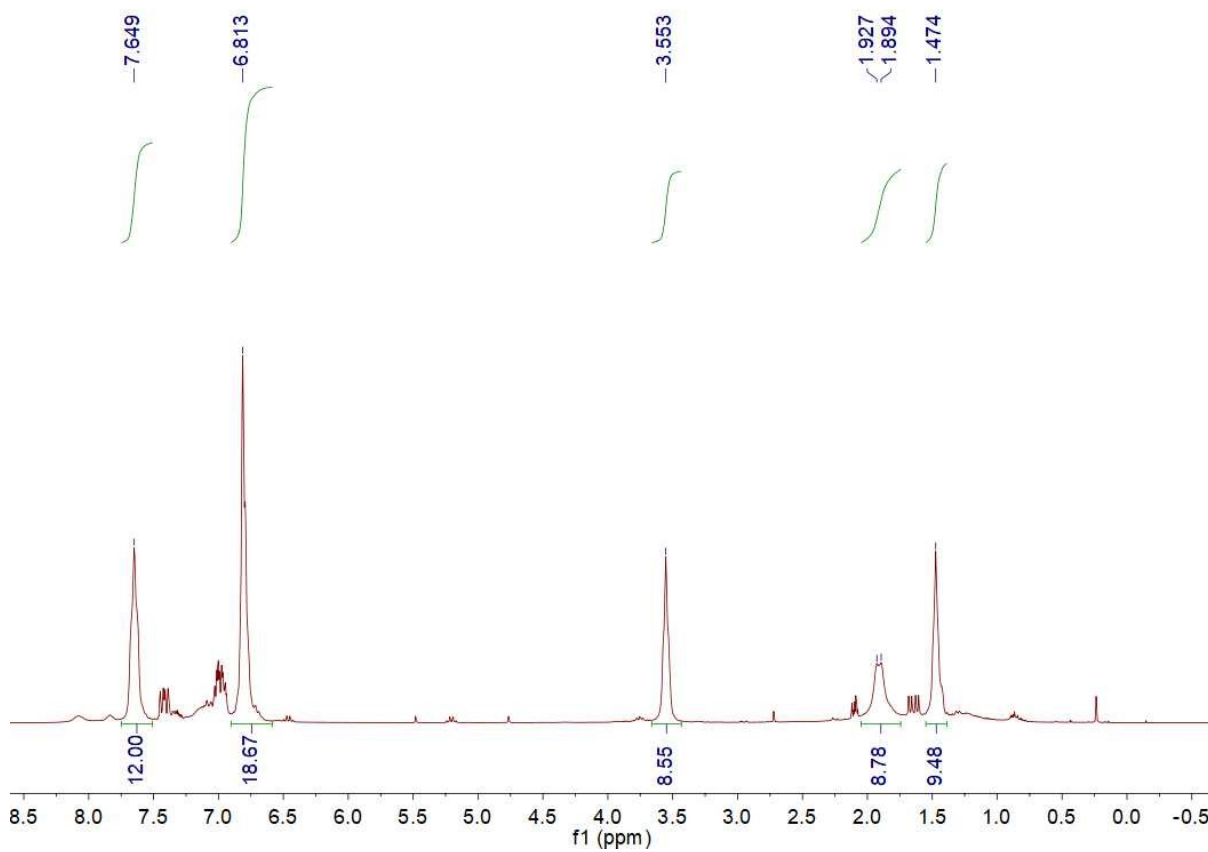

$^1\text{H}\{^{11}\text{B}\}$  NMR spectrum of **3K** in  $d_8$ -toluene.

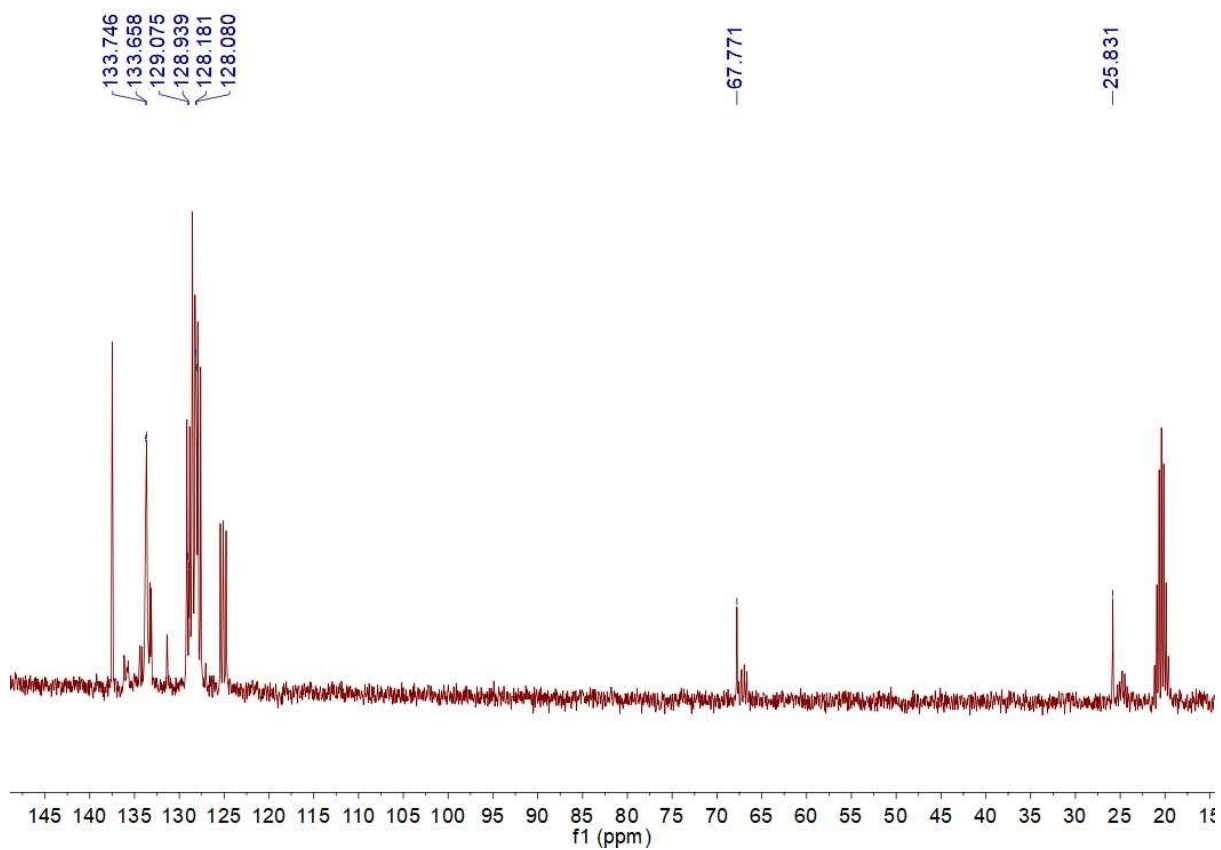

$^{13}\text{C}\{^1\text{H}\}$  NMR spectrum of **3K** in  $d_8$ -toluene.

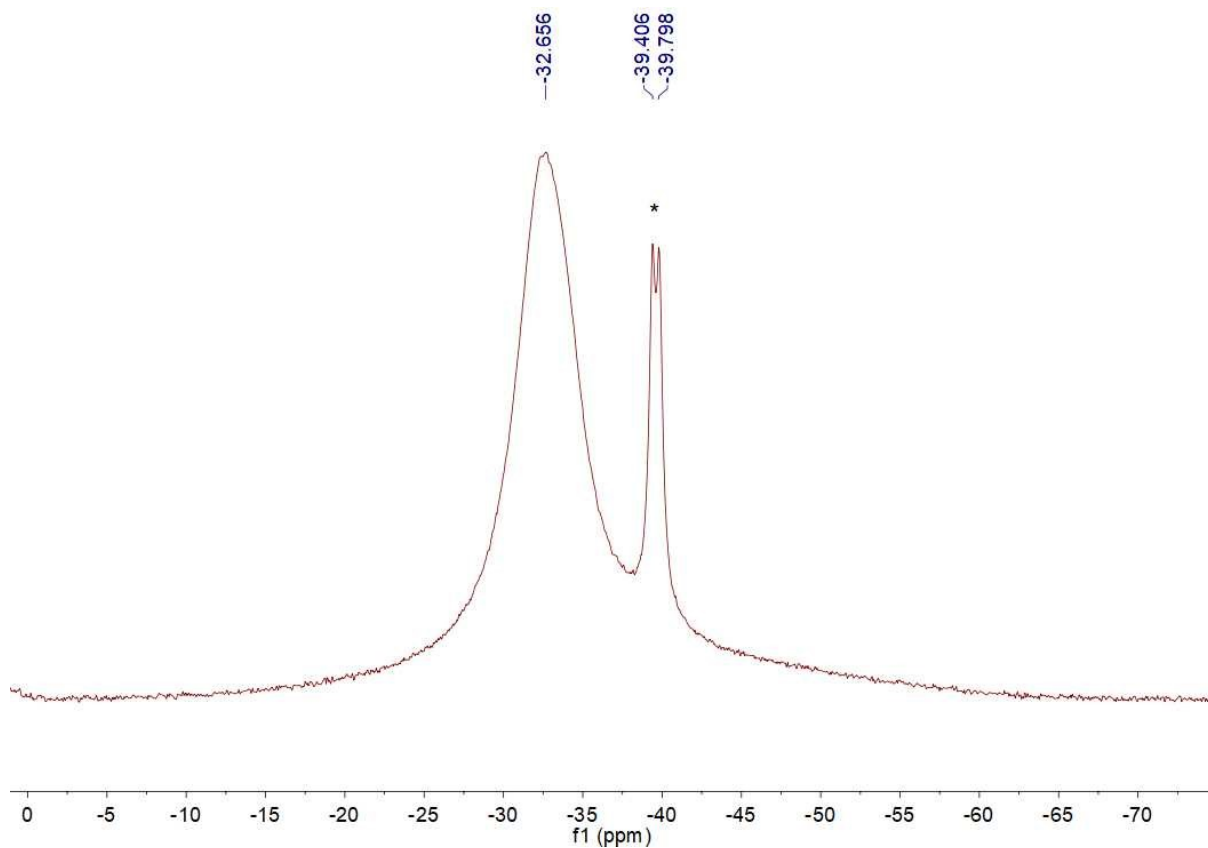

$^{11}\text{B}\{^1\text{H}\}$  NMR spectrum of **3K** in  $d_8$ -toluene (\*free phosphine-borane **3H** due to partial hydrolysis during sample preparation).



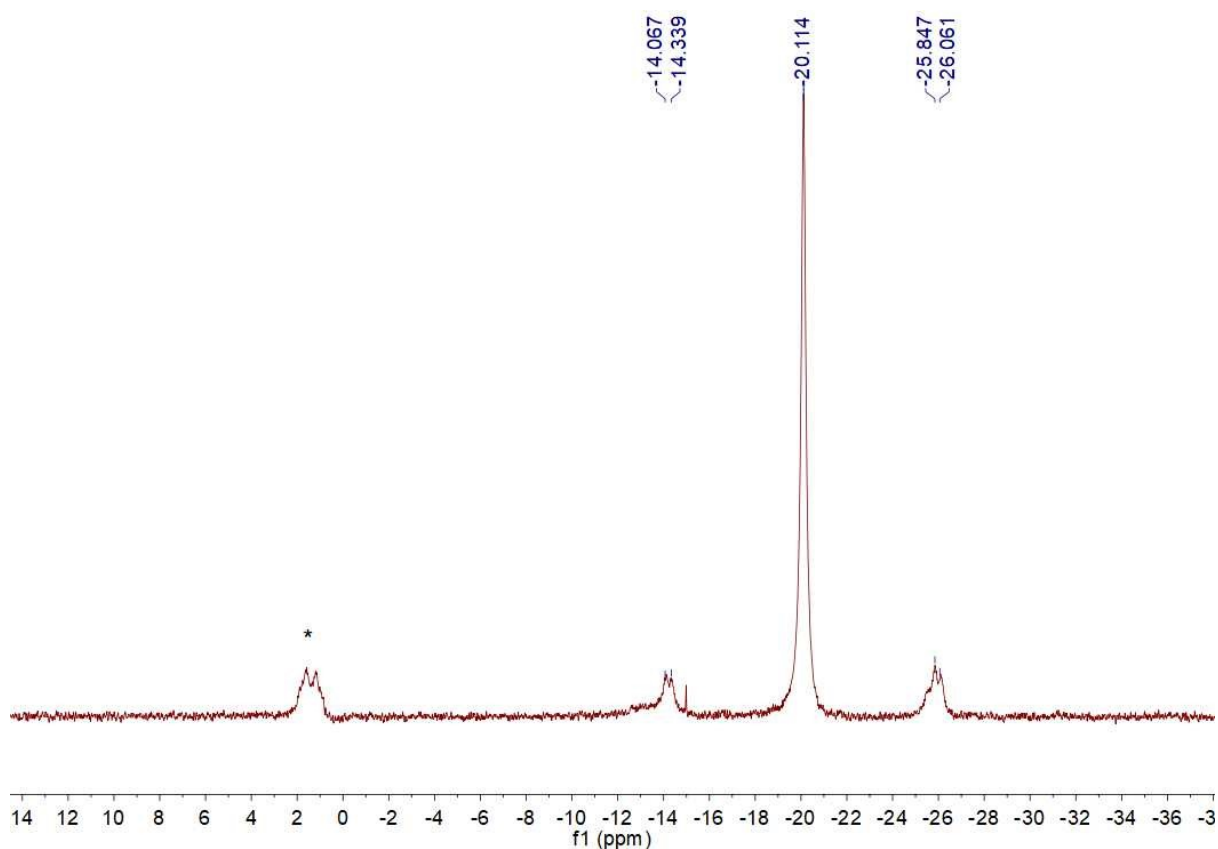

$^{31}\text{P}\{^1\text{H}\}$  NMR spectrum of **3K** in  $d_8$ -toluene (\*free phosphine-borane **3H** due to partial hydrolysis during sample preparation).

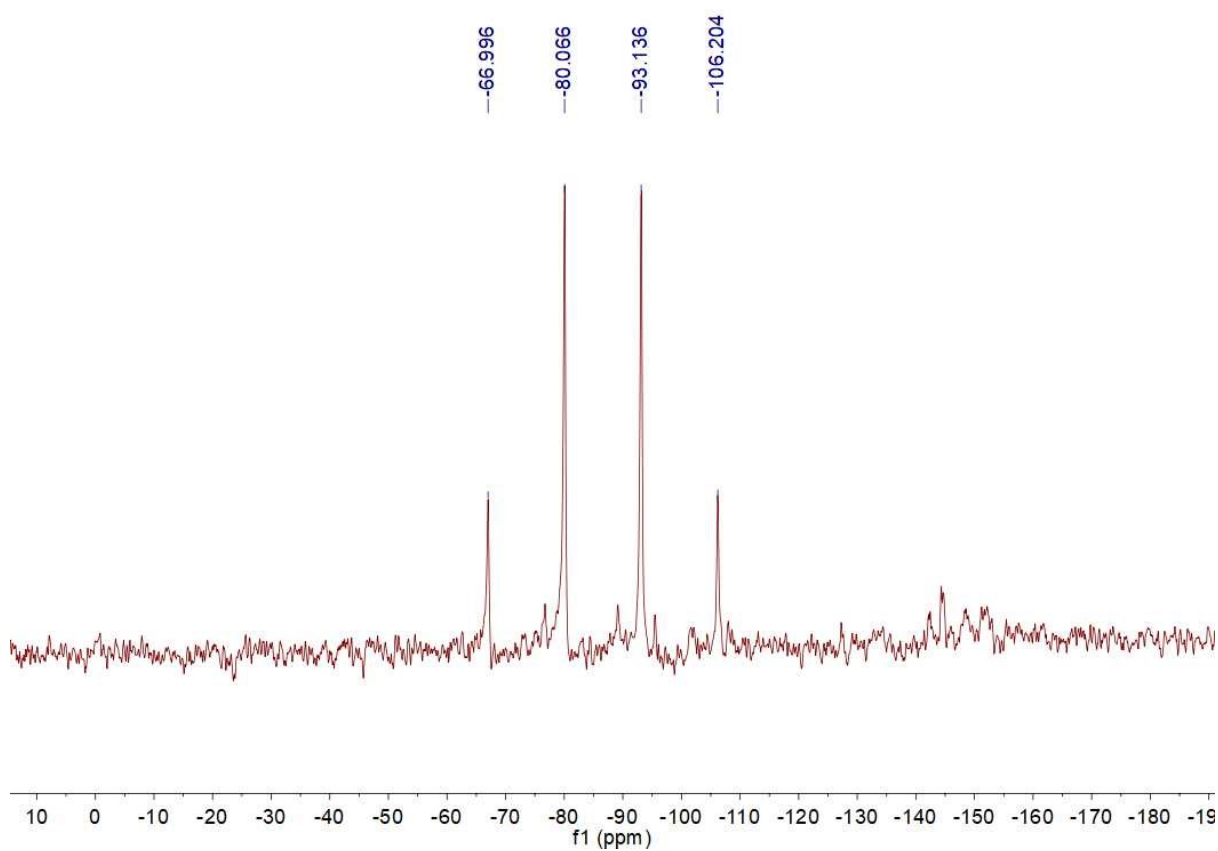

$^{119}\text{Sn}\{^1\text{H}\}$  NMR spectrum of **3K** in  $d_8$ -toluene.

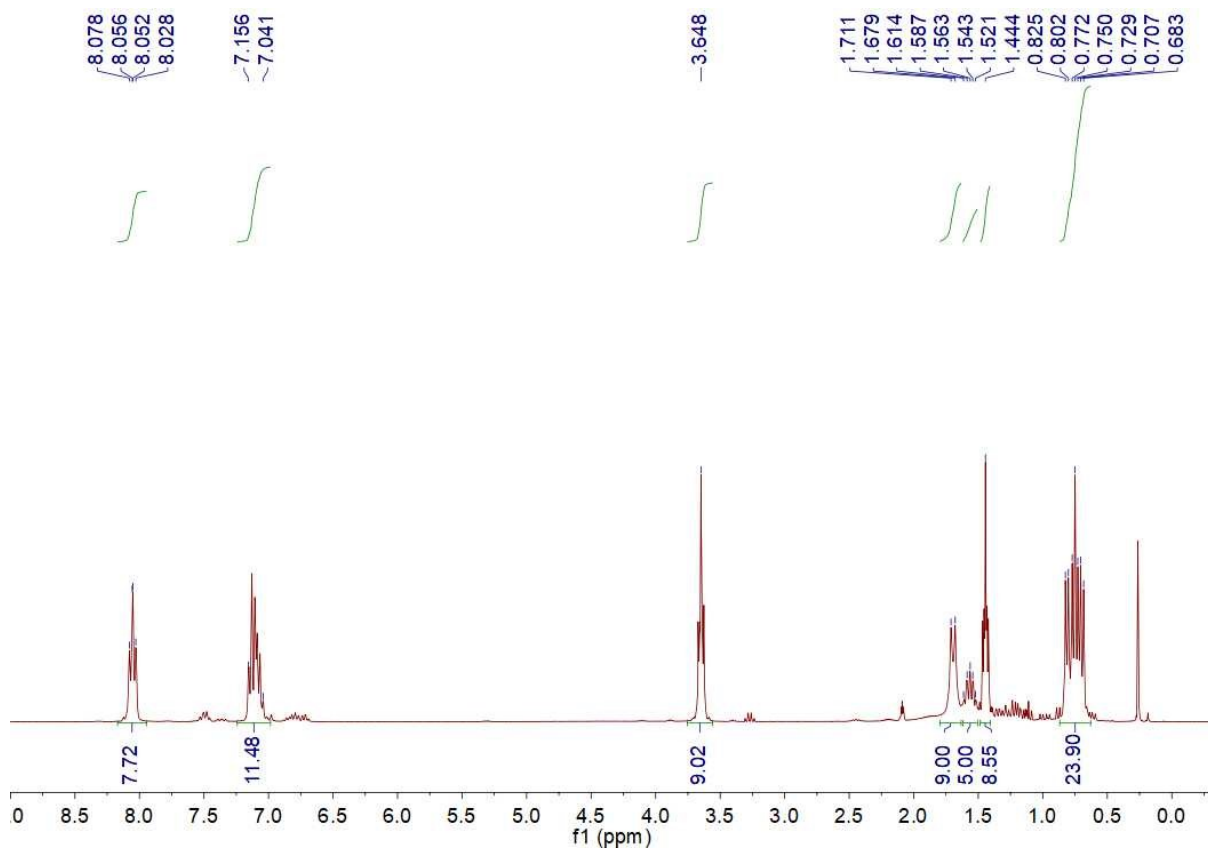

$^1\text{H}\{^{11}\text{B}\}$  NMR spectrum of **4Li** in  $d_8$ -toluene.

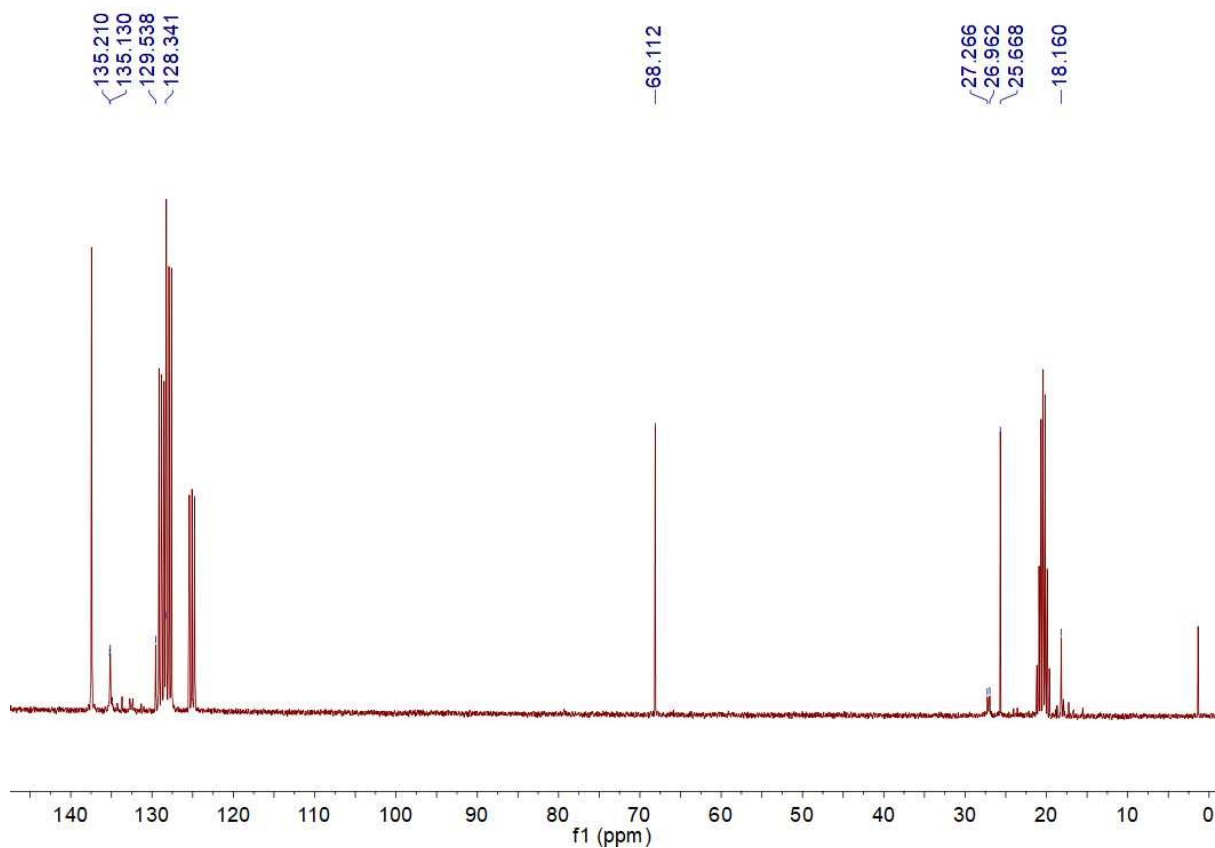

$^{13}\text{C}\{^1\text{H}\}$  NMR spectrum of **4Li** in  $d_8$ -toluene.

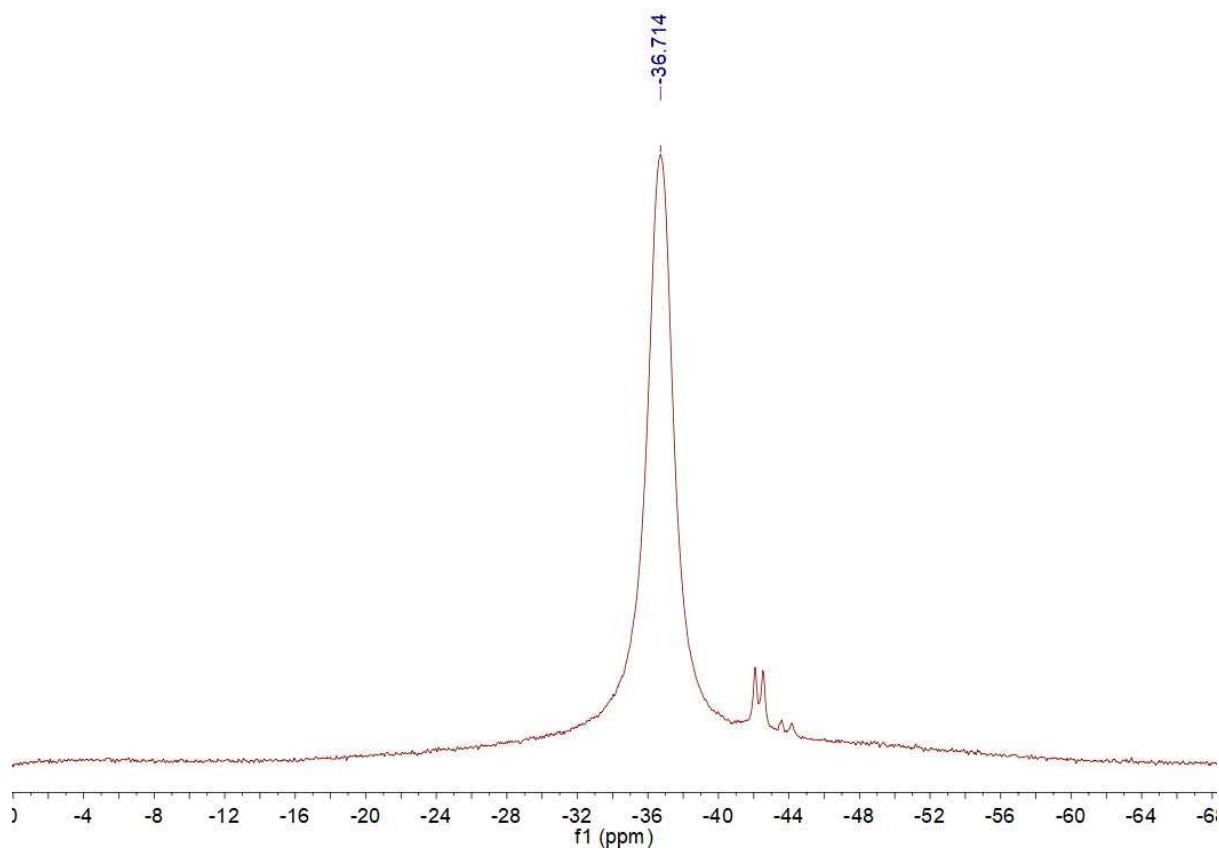

$^{11}\text{B}\{^1\text{H}\}$  NMR spectrum of **4Li** in  $d_8$ -toluene.

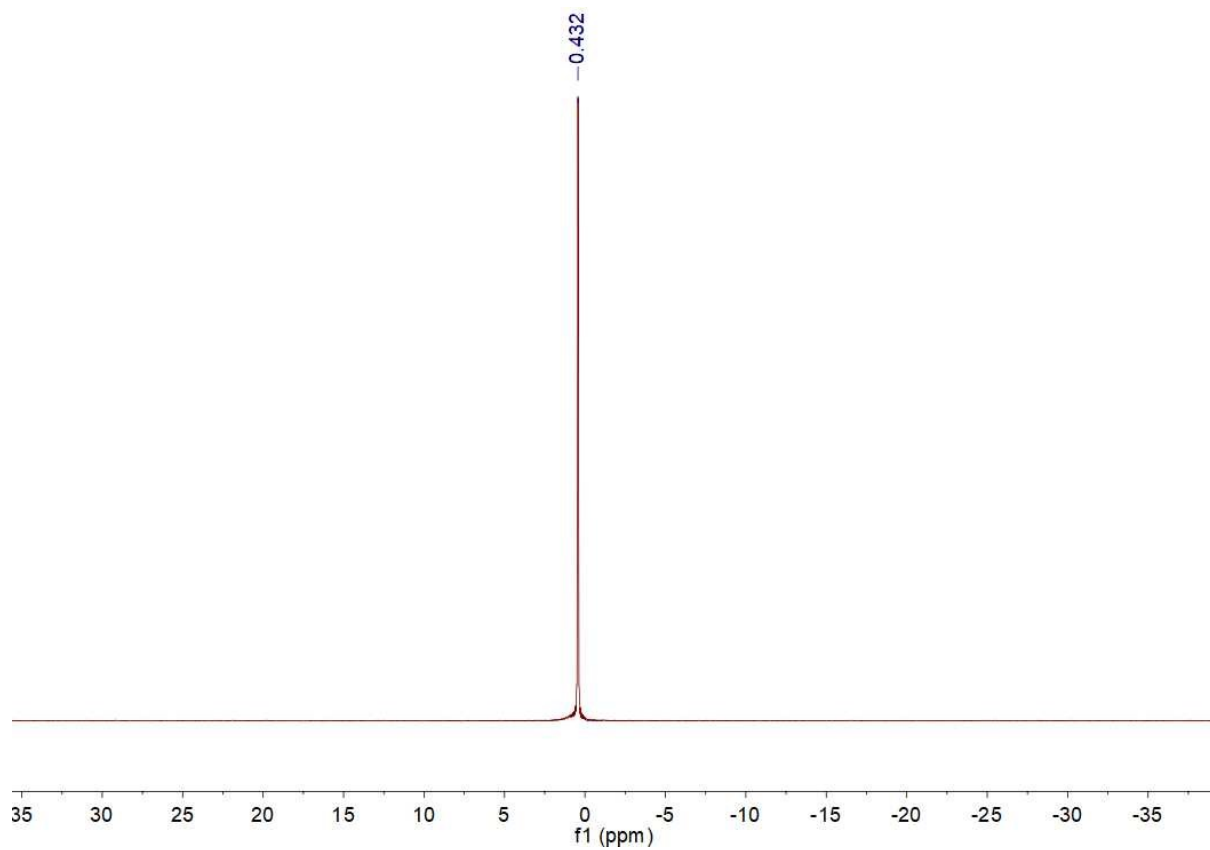

$^7\text{Li}\{^1\text{H}\}$  NMR spectrum of **4Li** in  $d_8$ -toluene.

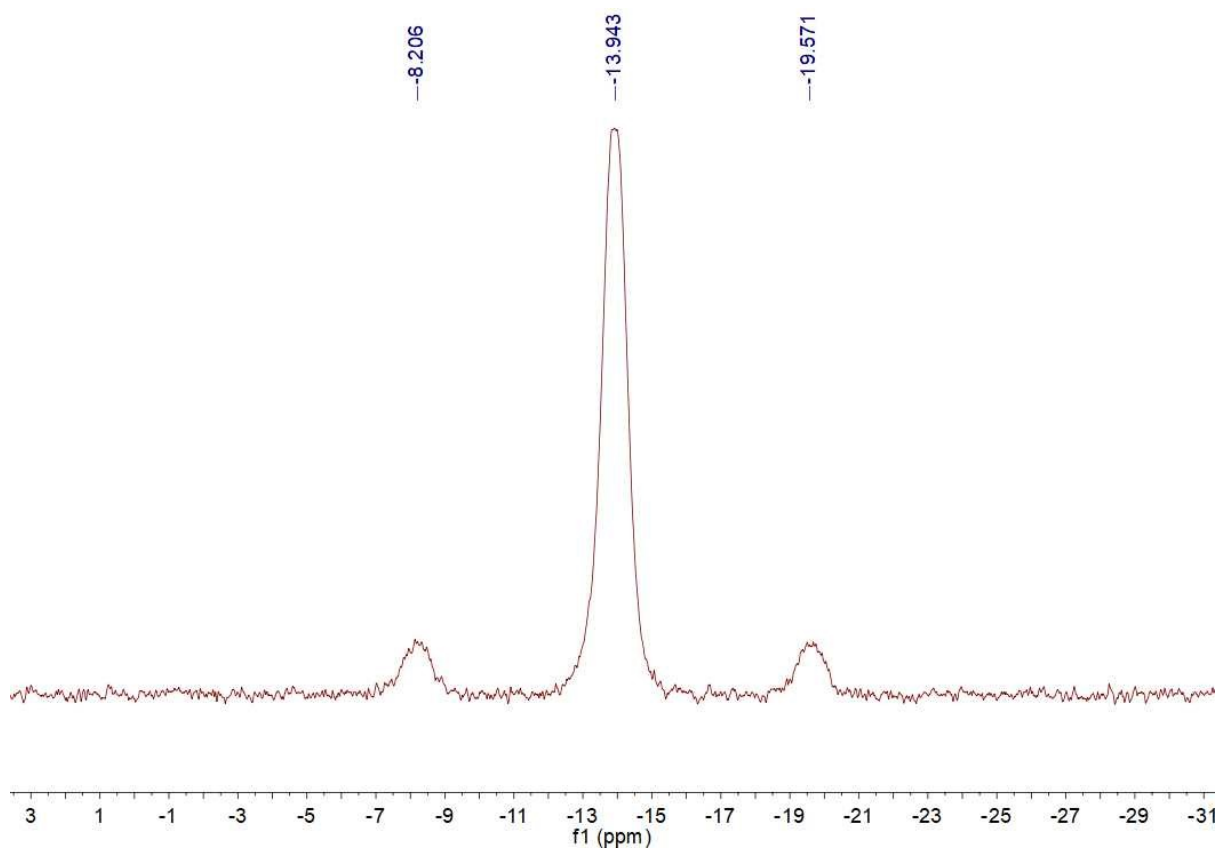

<sup>31</sup>P{<sup>1</sup>H} NMR spectrum of **4Li** in *d*<sub>8</sub>-toluene.

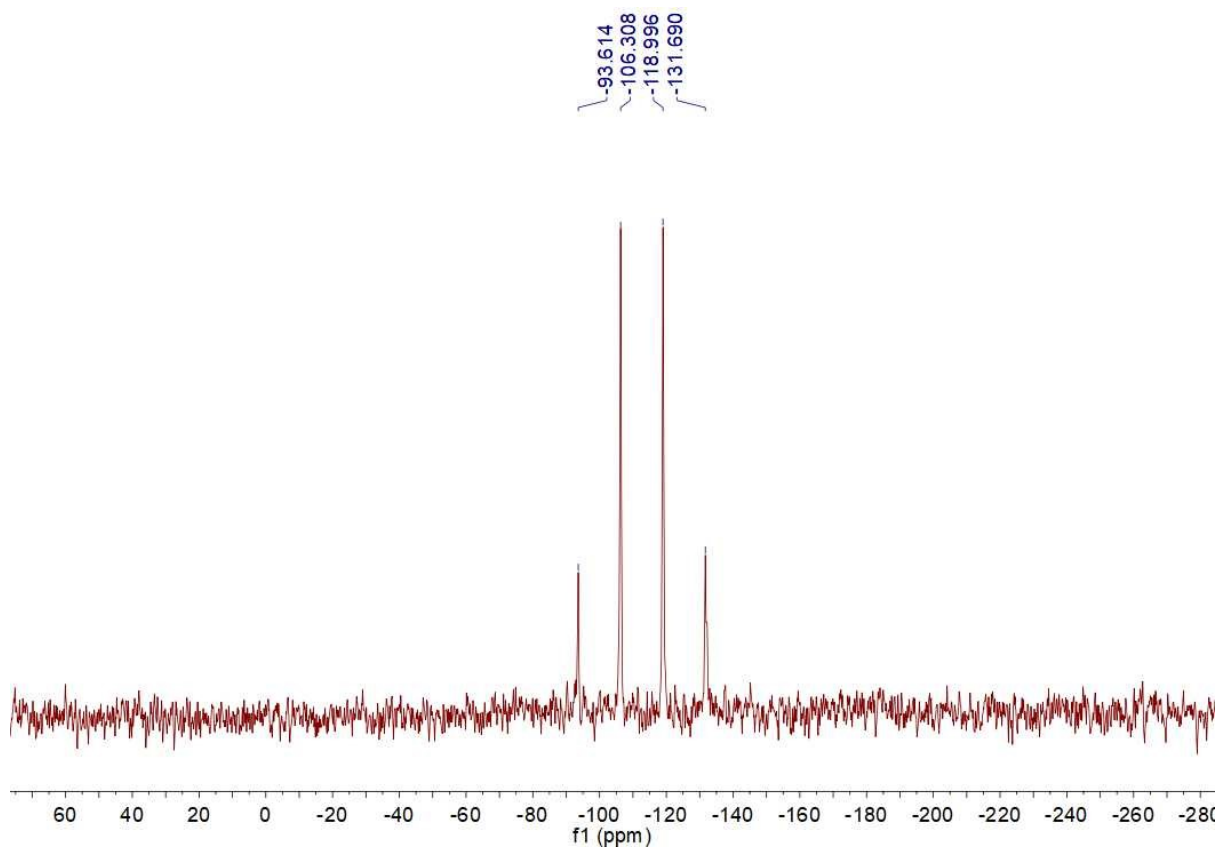

<sup>119</sup>Sn{<sup>1</sup>H} NMR spectrum of **4Li** in *d*<sub>8</sub>-toluene.

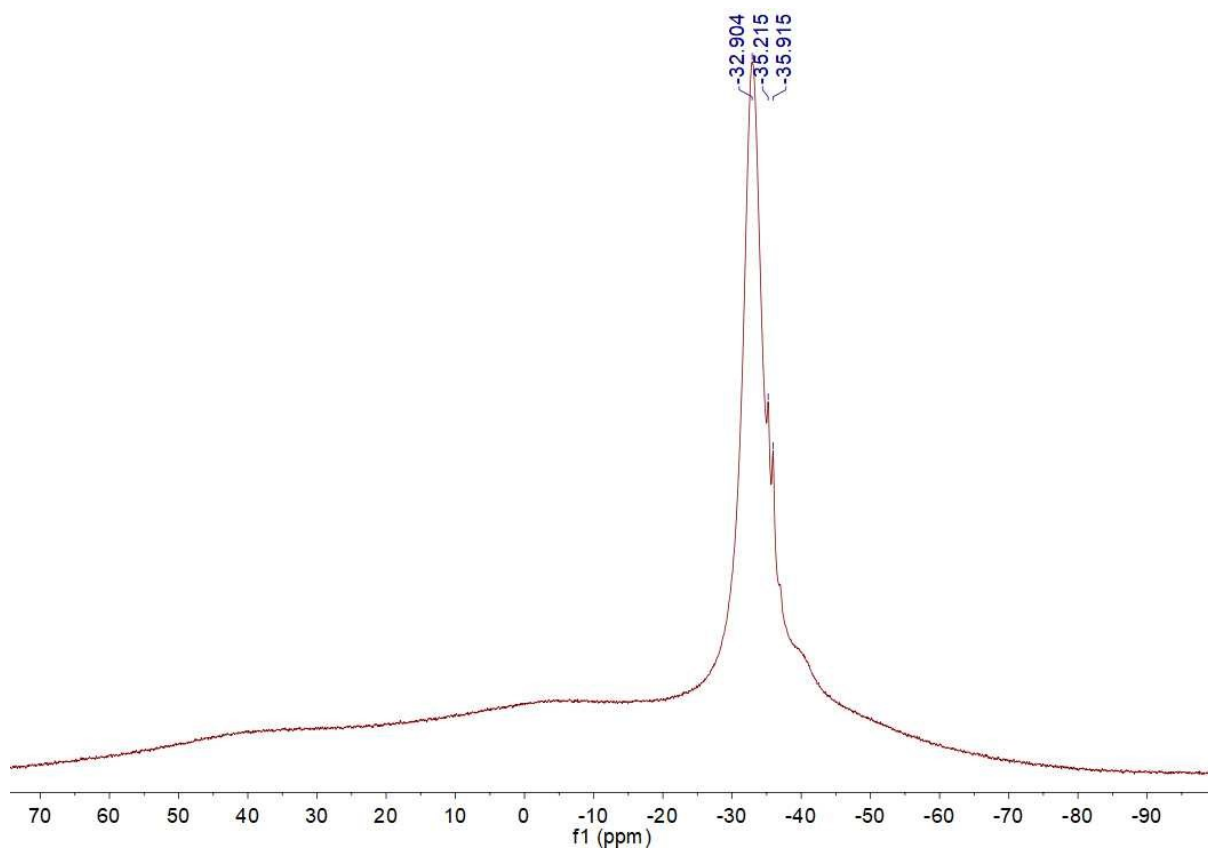

$^{11}\text{B}\{^1\text{H}\}$  NMR spectrum of a solution of **3Li** in THF, immediately after preparation.

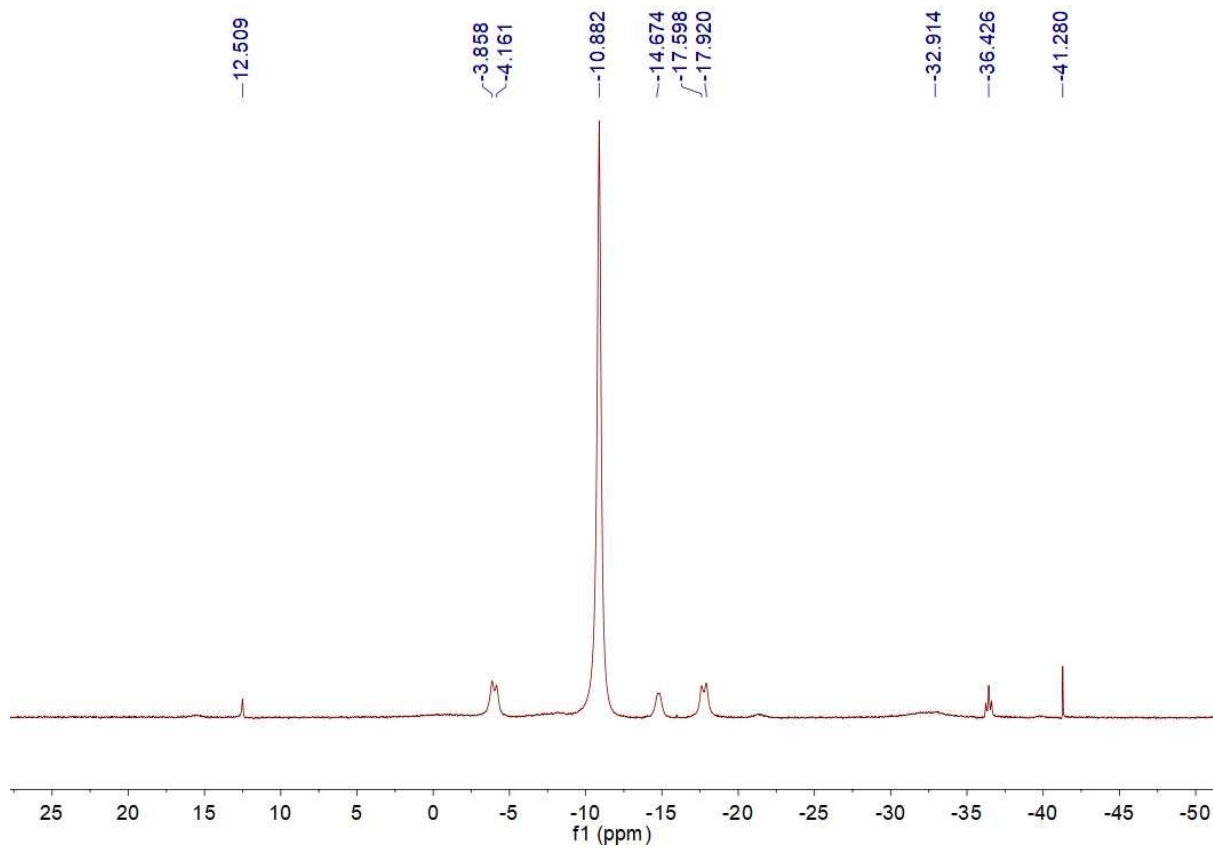

$^{31}\text{P}\{^1\text{H}\}$  NMR spectrum of a solution of **3Li** in THF, immediately after preparation.

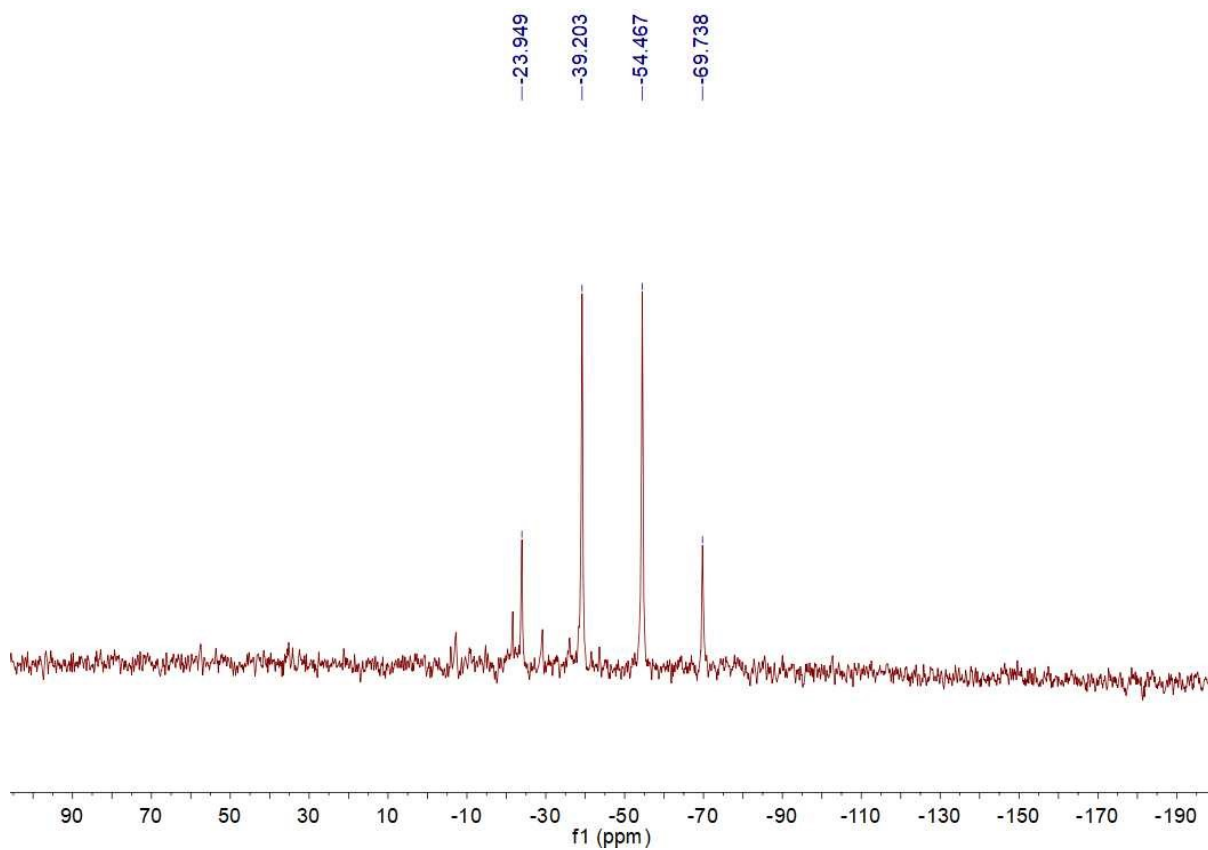

$^{119}\text{Sn}\{^1\text{H}\}$  NMR spectrum of a solution of **3Li** in THF, immediately after preparation.

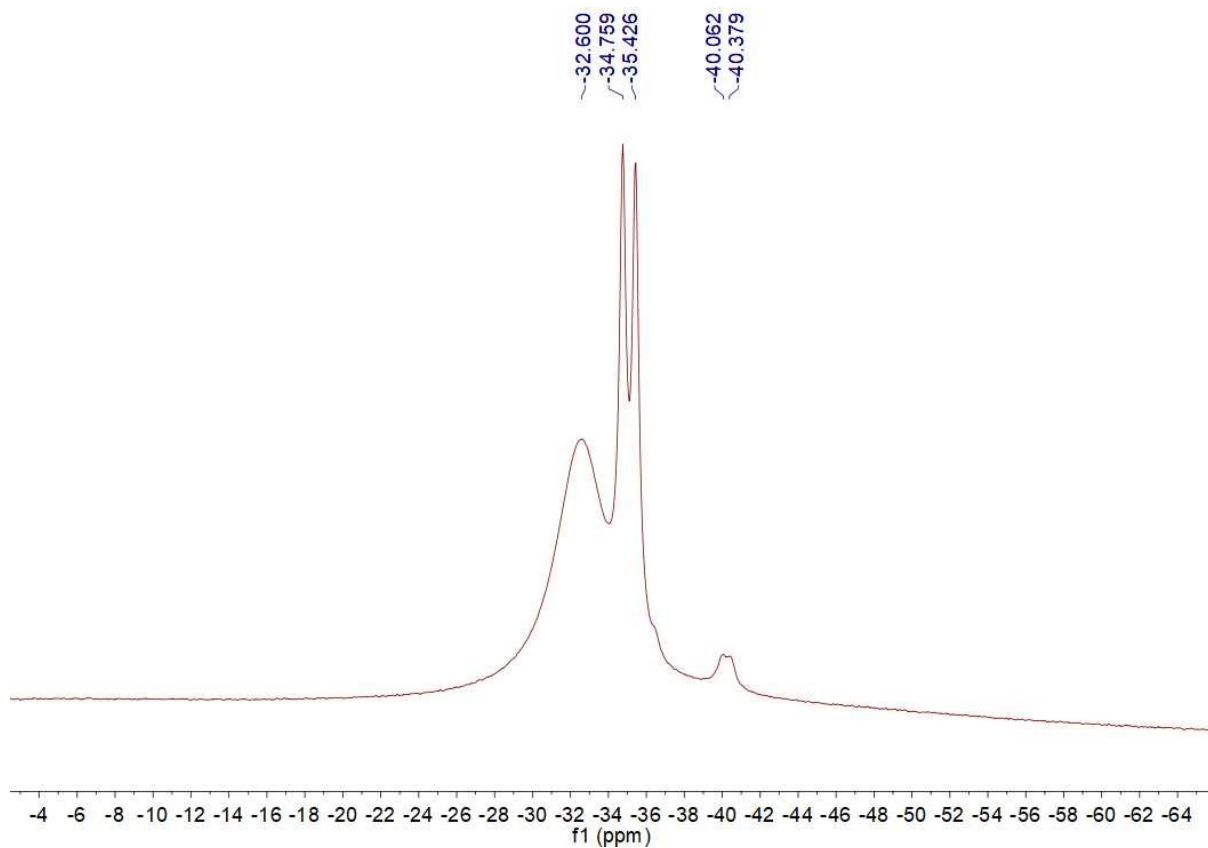

$^{11}\text{B}\{^1\text{H}\}$  NMR spectrum of a solution of **3Li** in THF, after 84 hours.

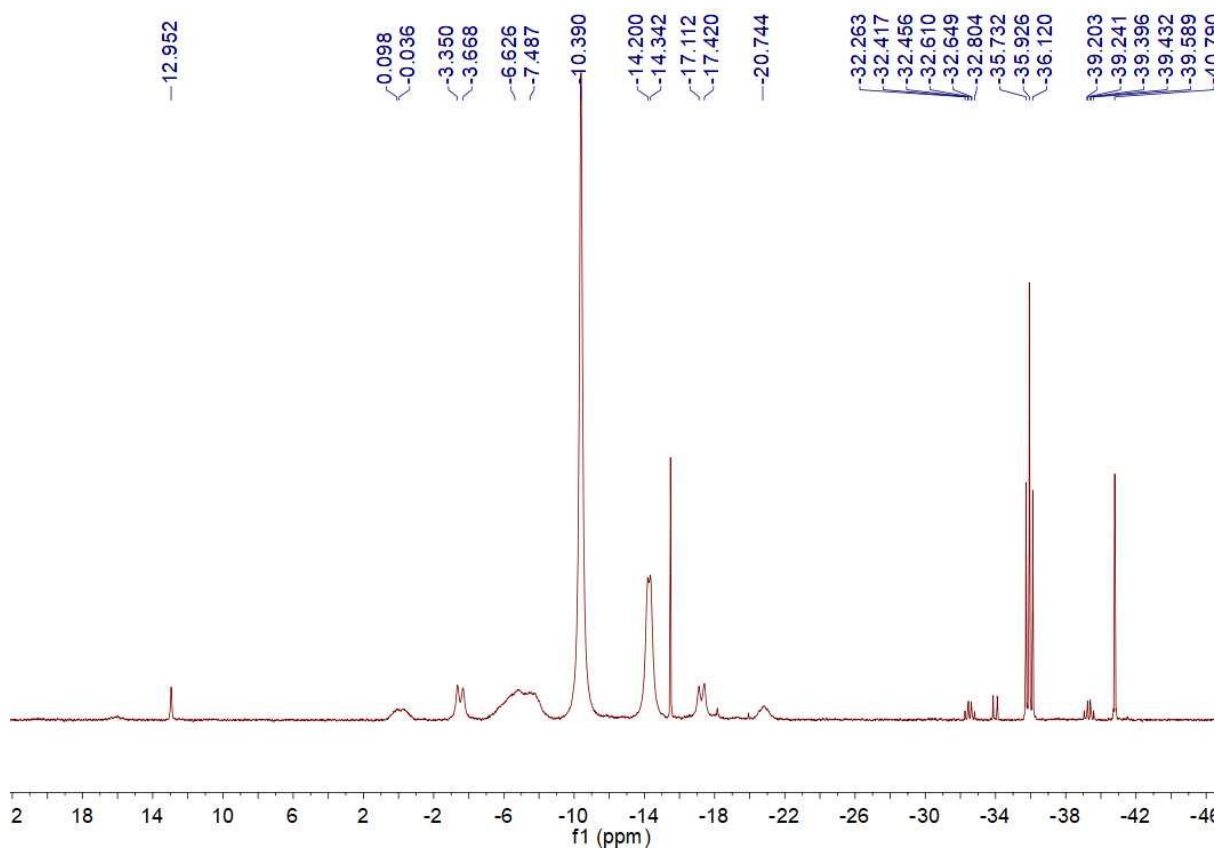

$^{31}\text{P}\{^1\text{H}\}$  NMR spectrum of a solution of **3Li** in THF, after 84 hours.

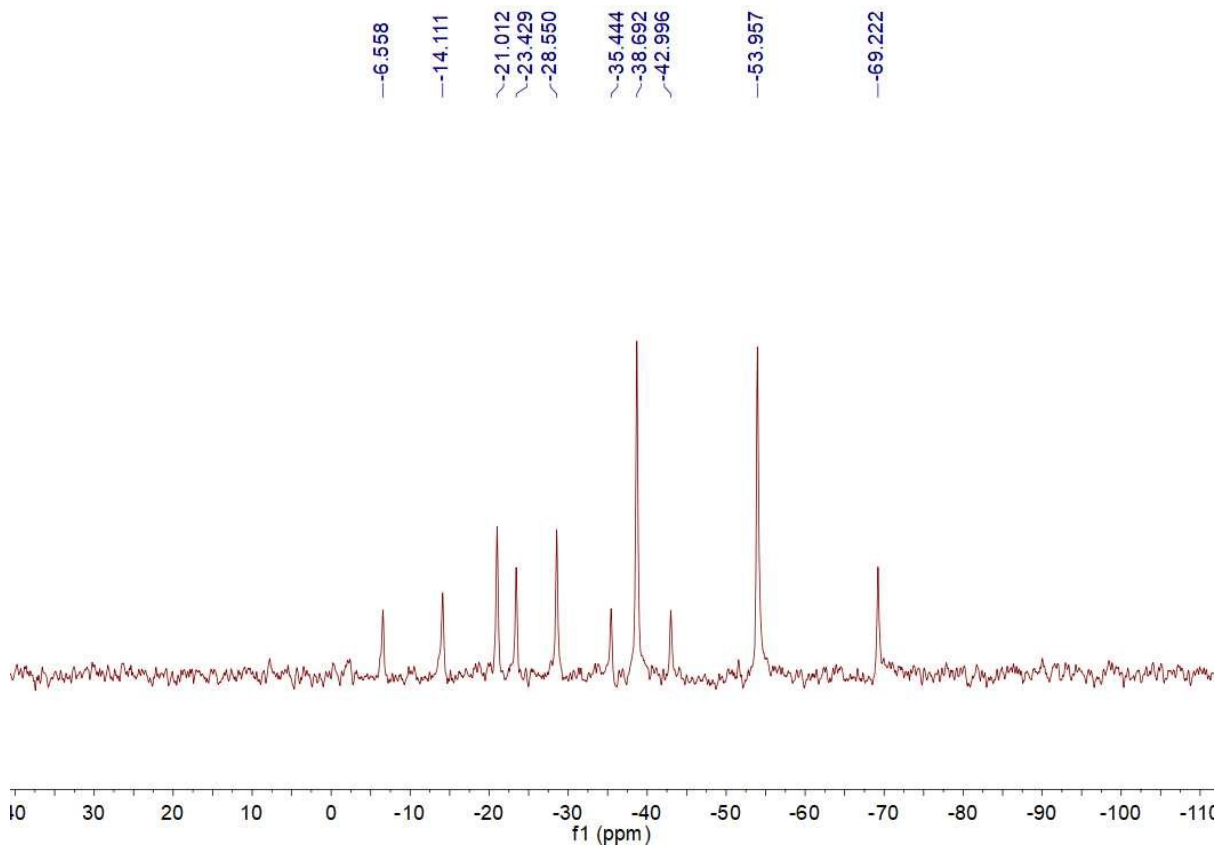

$^{119}\text{Sn}\{^1\text{H}\}$  NMR spectrum of a solution of **3Li** in THF, after 84 h.

**Table S1. Crystallographic data for 2Li, 2Na, 2K, 3Li, 3Na, 3K, and 4Li.**

| Compound                     | 2Li                                                                               | 2Na                                                                 | 2K                                                                 | 3Li                                                                 | 3Na                                                                               | 3K                                                                                                           | 4Li                                                                               |
|------------------------------|-----------------------------------------------------------------------------------|---------------------------------------------------------------------|--------------------------------------------------------------------|---------------------------------------------------------------------|-----------------------------------------------------------------------------------|--------------------------------------------------------------------------------------------------------------|-----------------------------------------------------------------------------------|
| formula                      | C <sub>30</sub> H <sub>75</sub> B <sub>3</sub> LiO <sub>3</sub> P <sub>3</sub> Sn | C <sub>22</sub> H <sub>61</sub> B <sub>3</sub> NaOP <sub>3</sub> Sn | C <sub>22</sub> H <sub>61</sub> B <sub>3</sub> KOP <sub>3</sub> Sn | C <sub>40</sub> H <sub>47</sub> B <sub>3</sub> LiOP <sub>3</sub> Sn | C <sub>44</sub> H <sub>57</sub> B <sub>3</sub> NaO <sub>2</sub> P <sub>3</sub> Sn | C <sub>88</sub> H <sub>114</sub> B <sub>6</sub> K <sub>2</sub> O <sub>4</sub> P <sub>6</sub> Sn <sub>2</sub> | C <sub>43</sub> H <sub>77</sub> B <sub>3</sub> LiO <sub>4</sub> P <sub>3</sub> Sn |
| <i>M<sub>w</sub></i>         | 734.87                                                                            | 608.72                                                              | 624.83                                                             | 794.74                                                              | 884.91                                                                            | 1802.05                                                                                                      | 909.01                                                                            |
| cryst. size (mm)             | 0.25 × 0.21 × 0.08                                                                | 0.31 × 0.23 × 0.2                                                   | 0.32 × 0.14 × 0.08                                                 | 0.2 × 0.16 × 0.11                                                   | 0.35 × 0.15 × 0.13                                                                | 0.33 × 0.16 × 0.05                                                                                           | 0.46 × 0.16 × 0.06                                                                |
| cryst. syst.                 | monoclinic                                                                        | monoclinic                                                          | monoclinic                                                         | orthorhombic                                                        | triclinic                                                                         | triclinic                                                                                                    | orthorhombic                                                                      |
| space group                  | <i>P2<sub>1</sub>/n</i>                                                           | <i>P2<sub>1</sub>/n</i>                                             | <i>P2<sub>1</sub>/n</i>                                            | <i>P2<sub>1</sub>2<sub>1</sub>2<sub>1</sub></i>                     | <i>P-1</i>                                                                        | <i>P-1</i>                                                                                                   | <i>Pbca</i>                                                                       |
| <i>a</i> (Å)                 | 12.40488(9)                                                                       | 10.9480(3)                                                          | 11.09083(13)                                                       | 12.0937(3)                                                          | 12.1003(2)                                                                        | 12.5263(4)                                                                                                   | 17.1453(3)                                                                        |
| <i>b</i> (Å)                 | 20.31668(13)                                                                      | 15.5585(3)                                                          | 15.64326(17)                                                       | 17.3507(5)                                                          | 19.4551(4)                                                                        | 12.8410(6)                                                                                                   | 19.0113(2)                                                                        |
| <i>c</i> (Å)                 | 17.70719(13)                                                                      | 20.1127(5)                                                          | 20.3678(3)                                                         | 19.0102(6)                                                          | 21.1123(4)                                                                        | 16.3428(5)                                                                                                   | 30.2806(5)                                                                        |
| <i>α</i> (deg)               |                                                                                   |                                                                     |                                                                    |                                                                     | 113.1030(19)                                                                      | 83.991(3)                                                                                                    |                                                                                   |
| <i>β</i> (deg)               | 109.9907(8)                                                                       | 94.156(2)                                                           | 95.5136(10)                                                        |                                                                     | 93.1405(17)                                                                       | 75.367(3)                                                                                                    |                                                                                   |
| <i>γ</i> (deg)               |                                                                                   |                                                                     |                                                                    |                                                                     | 91.4023(16)                                                                       | 62.619(4)                                                                                                    |                                                                                   |
| <i>V</i> (Å <sup>3</sup> )   | 4193.79(5)                                                                        | 3416.88(14)                                                         | 3517.40(7)                                                         | 3988.99(19)                                                         | 4558.93(17)                                                                       | 2258.33(16)                                                                                                  | 9870.1(3)                                                                         |
| <i>Z</i>                     | 4                                                                                 | 4                                                                   | 4                                                                  | 4                                                                   | 4                                                                                 | 1                                                                                                            |                                                                                   |
| <i>μ</i> (mm <sup>-1</sup> ) | 6.107                                                                             | 0.913                                                               | 0.993                                                              | 0.791                                                               | 0.709                                                                             | 0.799                                                                                                        | 0.651                                                                             |



|                                                  |            |            |            |            |            |            |            |
|--------------------------------------------------|------------|------------|------------|------------|------------|------------|------------|
| reflns. measd.                                   | 30391      | 28063      | 112187     | 21477      | 73117      | 36224      | 151804     |
| unique reflns.                                   | 7442       | 7728       | 9067       | 7674       | 20675      | 10194      | 12235      |
| $R_{\text{int}}$                                 | 0.045      | 0.046      | 0.046      | 0.047      | 0.045      | 0.047      | 0.059      |
| refined params.                                  | 421        | 321        | 321        | 484        | 1176       | 563        | 664        |
| $R$ (on $F$ , $F^2 > 2\sigma$ )                  | 0.027      | 0.035      | 0.024      | 0.037      | 0.037      | 0.040      | 0.040      |
| $R_w$ (on $F^2$ , all data)                      | 0.066      | 0.078      | 0.046      | 0.072      | 0.080      | 0.081      | 0.094      |
| goodness of fit                                  | 1.036      | 1.078      | 1.066      | 1.043      | 1.100      | 1.025      | 1.011      |
| max, min electron density (e $\text{\AA}^{-3}$ ) | 0.42,-0.37 | 0.77,-0.45 | 0.39,-0.27 | 0.76,-0.43 | 0.70,-0.44 | 0.48,-0.49 | 0.96,-0.58 |

---

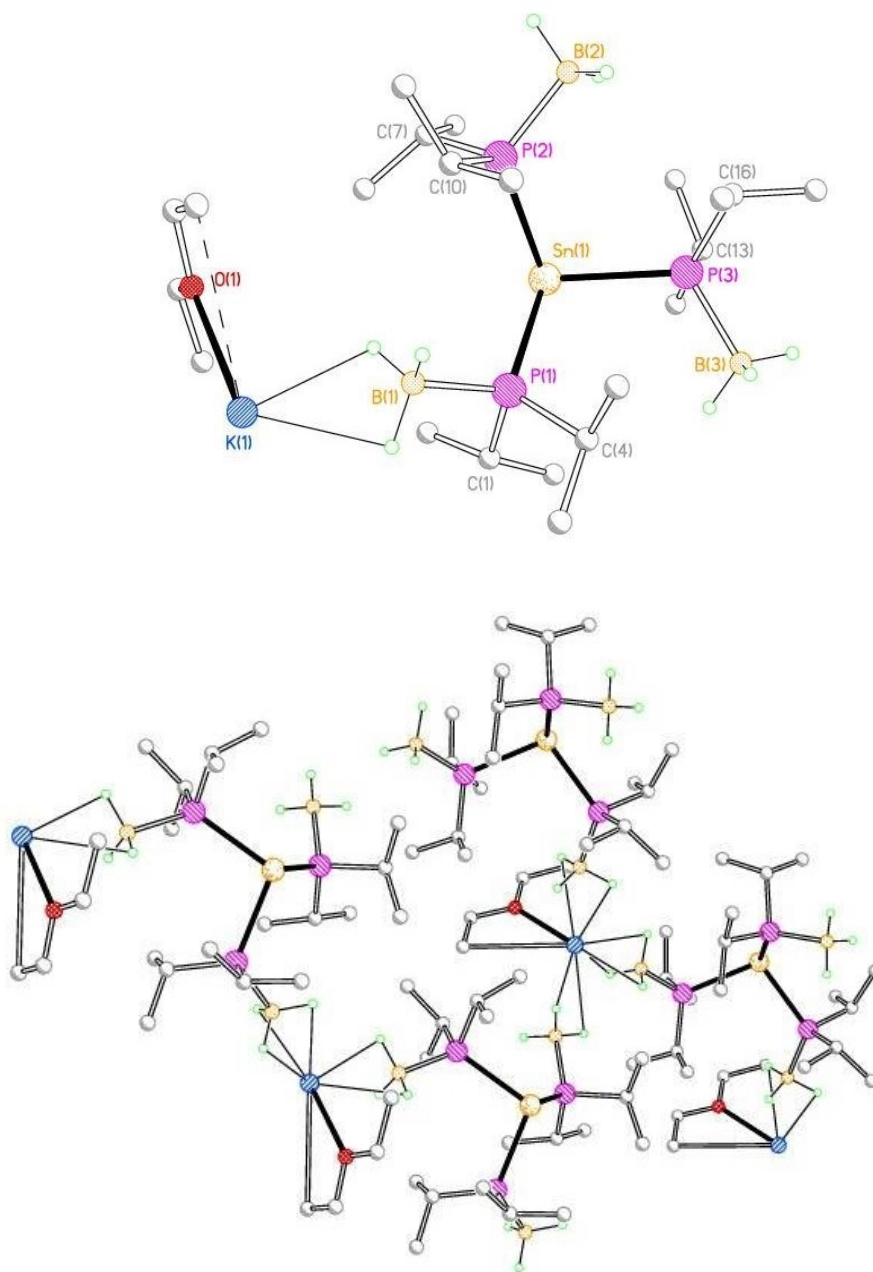

**Figure S1.** Polymeric structure of **2K**. Selected bond lengths (Å) and angles (°): Sn(1)-P(1) 2.6341(4), Sn(1)-P(2) 2.6312(4), Sn(1)-P(3) 2.6352(4), P(1)-B(1) 1.9486(18), P(2)-B(2) 1.9454(18), P(3)-B(3) 1.945(2), K(1)···B(1) 3.0125(18), K(1)···B(2A) 3.0104(18), K(1)···B(3B) 3.0617(19), K(1C)···B(2) 3.0104(18), K(1D)···B(2) 3.0618(19), K(1)-O(1) 2.6999(11), P(1)-Sn(1)-P(2) 103.646(12), P(1)-Sn(1)-P(3) 102.981(12), P(2)-Sn(1)-P(3) 103.026(12).

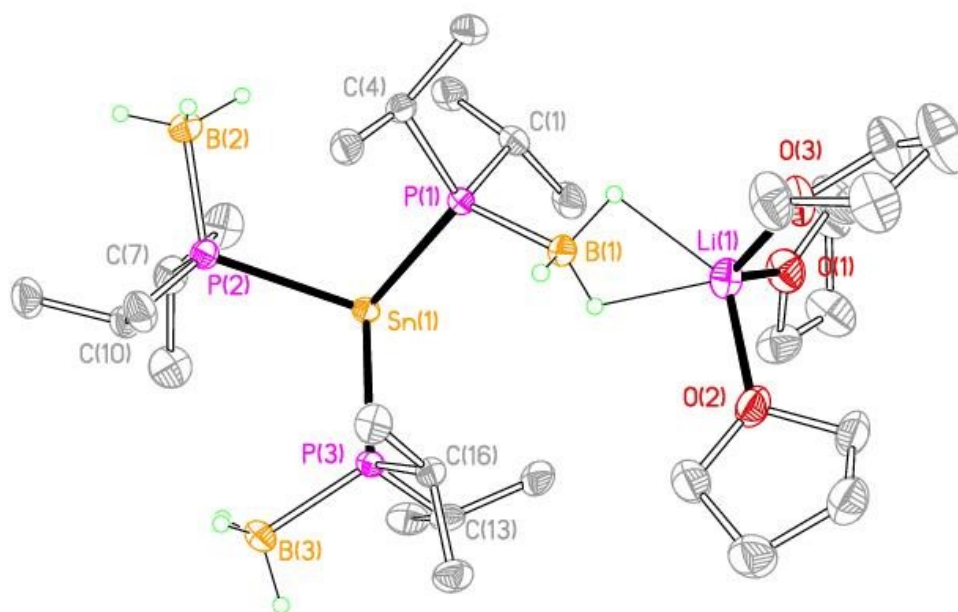

**Figure S2.** Asymmetric unit of **2Li** with 40% thermal ellipsoids and with minor disorder and C-bound H atoms omitted for clarity.

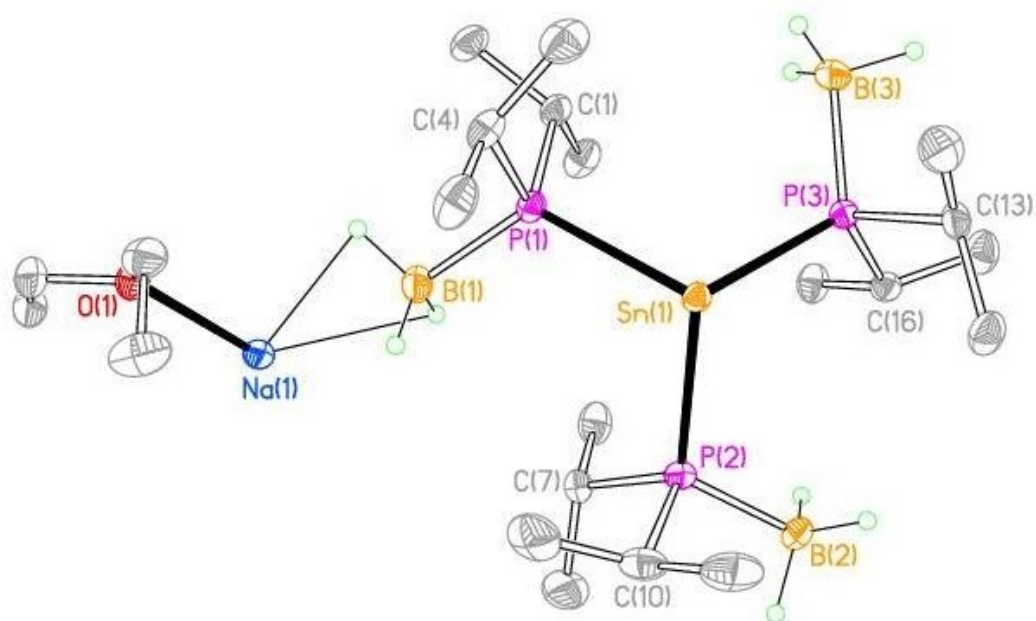

**Figure S3.** Asymmetric unit of **2Na** with 40% thermal ellipsoids and with C-bound H atoms omitted for clarity.

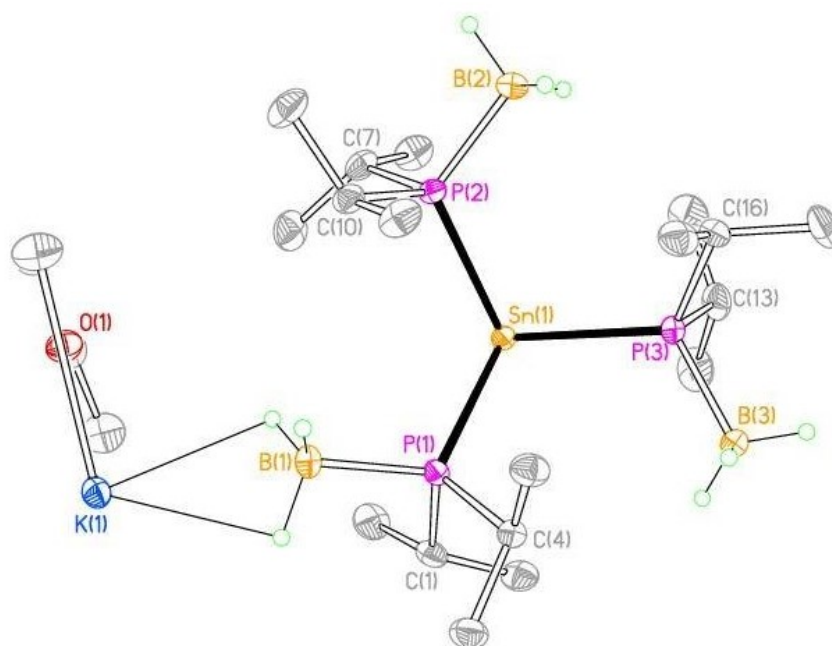

**Figure S4.** Asymmetric unit of **2K** with 40% thermal ellipsoids and with C-bound H atoms omitted for clarity.

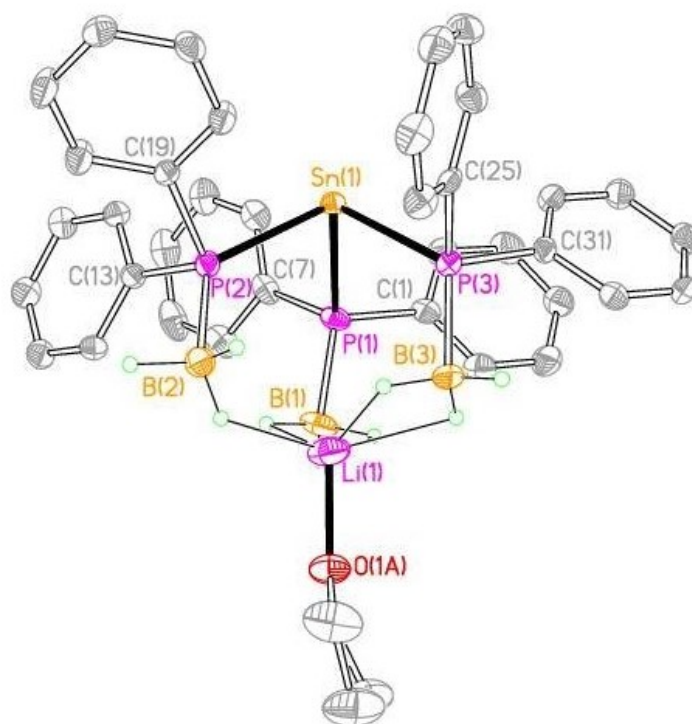

**Figure S5.** Asymmetric unit of **3Li** with 40% thermal ellipsoids and with minor disorder and C-bound H atoms omitted for clarity.

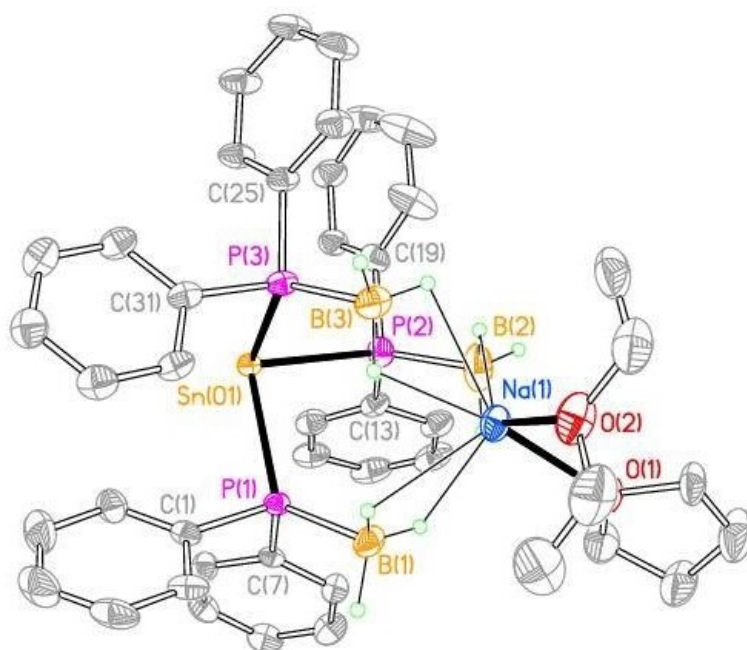

**Figure S6.** One of the two independent molecules in the asymmetric unit of **3Na** with 40% thermal ellipsoids and with minor disorder and C-bound H atoms omitted for clarity.

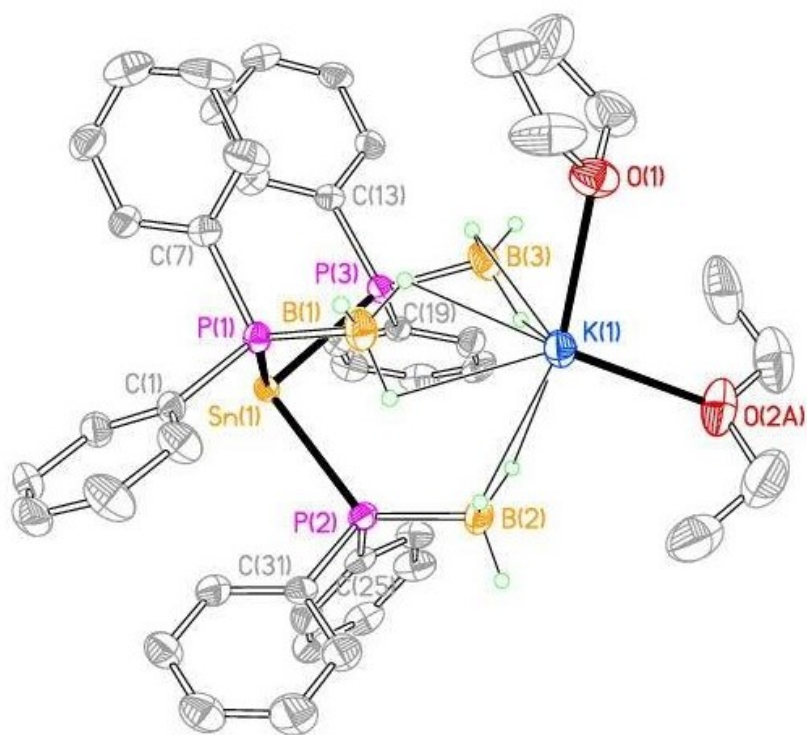

**Figure S7.** Asymmetric unit of **3K** with 40% thermal ellipsoids and with minor disorder and C-bound H atoms omitted for clarity.

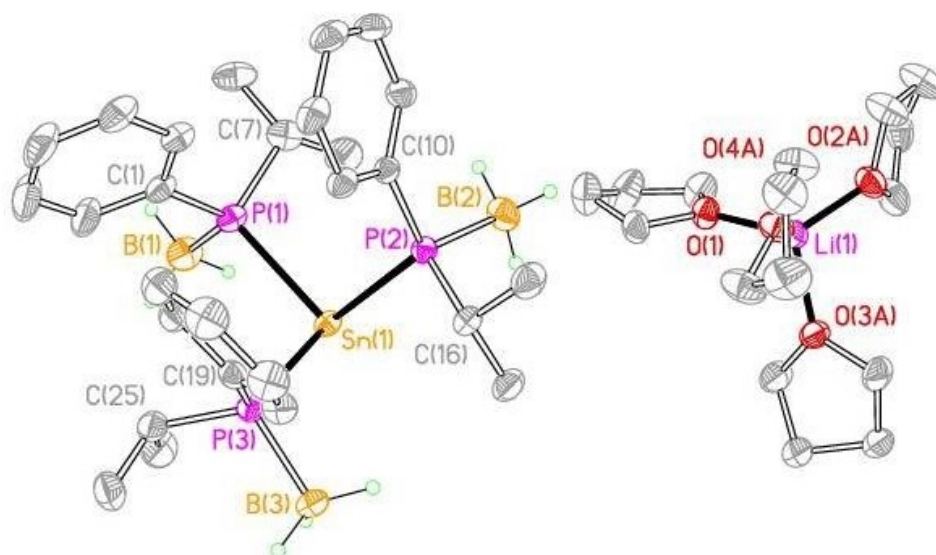

**Figure S8.** Asymmetric unit of **4Li** with 40% thermal ellipsoids and with minor disorder and C-bound H atoms omitted for clarity.
